# Supplementary material
Source: Royal Society of Chemistry journal article supplement (doi:10.1039/d6ob00544f)
Supplement: d6ob00544f1.pdf [file d6ob00544f1.pdf]

## Supplementary Information

### Racemising 3-aryl-3-hydroxy-2-oxindoles in a Pickering emulsion under acid catalysis and its application to dynamic kinetic resolution

Jihoon Moon,<sup>a</sup> Shuji Akai,<sup>\*a‡</sup> Kyohei Kanomata<sup>\*a</sup>

<sup>a</sup>Graduate School of Pharmaceutical Sciences, The University of Osaka, 1-6 Yamadaoka, Suita, Osaka 565-0871, Japan. Email: kanomata@phs.osaka-u.ac.jp

‡Current address: SANKEN, The University of Osaka, 8-1 Mihogaoka, Ibaraki, Osaka 567-0047, Japan

#### Table of contents

|                                                                     |    |
|---------------------------------------------------------------------|----|
| 1. General information .....                                        | 2  |
| 2. Preparation of and characterisation of Pickering emulsions ..... | 2  |
| 3. Substrate synthesis .....                                        | 3  |
| 4. Racemisation in Pickering emulsion .....                         | 8  |
| 5. Dynamic kinetic resolution in Pickering emulsion .....           | 12 |
| 6. References .....                                                 | 13 |
| 7. NMR and HPLC charts .....                                        | 14 |

## 1. General information

$^1\text{H}$ ,  $^{13}\text{C}$  and  $^{19}\text{F}$  NMR spectra were measured on a JEOL-ECA500 instrument ( $^1\text{H}$ : 500 MHz,  $^{13}\text{C}$ : 126 MHz,  $^{19}\text{F}$ : 471 MHz). Chemical shifts were reported in  $\delta$  (ppm). Chemical shifts were reported in  $\delta$  (ppm) relative to the deuterated solvents (7.26 ppm ( $^1\text{H}$ ) and 77.0 ppm ( $^{13}\text{C}$ ) for  $\text{CDCl}_3$ ). Data are reported as follows: chemical shift, multiplicity (s = singlet, d = doublet, t = triplet, q = quartet, m = multiplet, br = broad), coupling constants (Hz) and integration. HPLC analyses were carried out using a JASCO LC-2000 Plus system (HPLC pump: PU-2080, UV detector: MD-2018) equipped with a chiral stationary phase column (4.6  $\times$  250 mm). Optical rotations were measured on a JASCO P-1020 polarimeter. High resolution mass spectra were measured on a JEOL JMS-T100LP (ESI) with a time of flight (TOF) mass analyzer.

All reagents were purchased from Tokyo Chemical Industry Co., Ltd. (Tokyo, Japan), FUJIFILM Wako Chemical Co., Ltd. (Osaka, Japan), NACALAI TESQUE, INC. (Kyoto, Japan), and Merck Co., LLC (U.S.A.), and used without further purification. Molecular sieves 4 Å (powder, activated, -325 mesh particle size) was purchased from Merck, treated in a microwave (600 W, 1 min.), and then allowed to cool in vacuo prior to use. Flash chromatography was performed on silica gel 60N (particle size 40–50  $\mu\text{m}$ ) purchased from Kanto Chemical Co., Inc. (Tokyo, Japan).

## 2. Preparation of and characterisation of Pickering emulsions

Silica nanoparticles were prepared according to the literature method with a slight modification.<sup>[1,2]</sup> In brief, a mixture of EtOH (200 mL), deionised water (50 mL), aq. 27%  $\text{NH}_3$  (11.2 mL), and  $\text{Si}(\text{OEt})_4$  (8.32 g) were stirred 12 h at room temperature. The formed nanoparticles were collected by centrifugation at 12,000 rpm for 5 min (KUBOTA 6200). The precipitate was washed by deionised water for 3 times, and then EtOH for 2 times by centrifugation. Then the precipitate was dried overnight at 120°C under vacuum (5 mmHg).

Hydrophobic modification of the silica nanoparticles was conducted according to the literature method.<sup>[1]</sup> The dried silica nanoparticles (1.0 g),  $\text{MeSi}(\text{OMe})_3$  (3.0 mmol) and  $\text{Et}_3\text{N}$  (3.0 mmol) were added to anhydrous toluene (6 mL), and the resultant suspension was refluxed with vigorous stirring for 4 h under argon atmosphere. After that, the suspension was centrifuged at 12,000 rpm for 10 min, and the precipitate was washed by EtOH for 5 times. The resultant precipitate was dried at 60°C overnight under vacuum (5 mmHg).

Methyl-modified silica nanoparticles (30 mg) were added to a screw-capped vial ( $\phi$  = 15 mm) containing *n*-octane (1.0 mL) and water or an aqueous acid solution (300  $\mu\text{L}$ ). The mixture was homogenised at 20,000 rpm for 90 sec using a T10 basic ULTRA-TURRAX homogenizer (IKA) equipped with a S10N-5G Dispersing tool. The prepared emulsion droplets were observed

using an Olympus FSX100 optical microscope (Figure S1). The Pickering emulsions were stable under the reaction conditions (5.0 M H<sub>2</sub>SO<sub>4</sub>, 80 °C, 18 h), with no colour changes or degradation observed during the reactions. A further increase in acid concentration, i.e. 7.0 M H<sub>2</sub>SO<sub>4</sub>, resulted in slight browning of the emulsion after 18 h of incubation at 70 °C. These observations suggest that the surface of the methyl-modified silica nanoparticles was partially degraded under higher acid concentration.

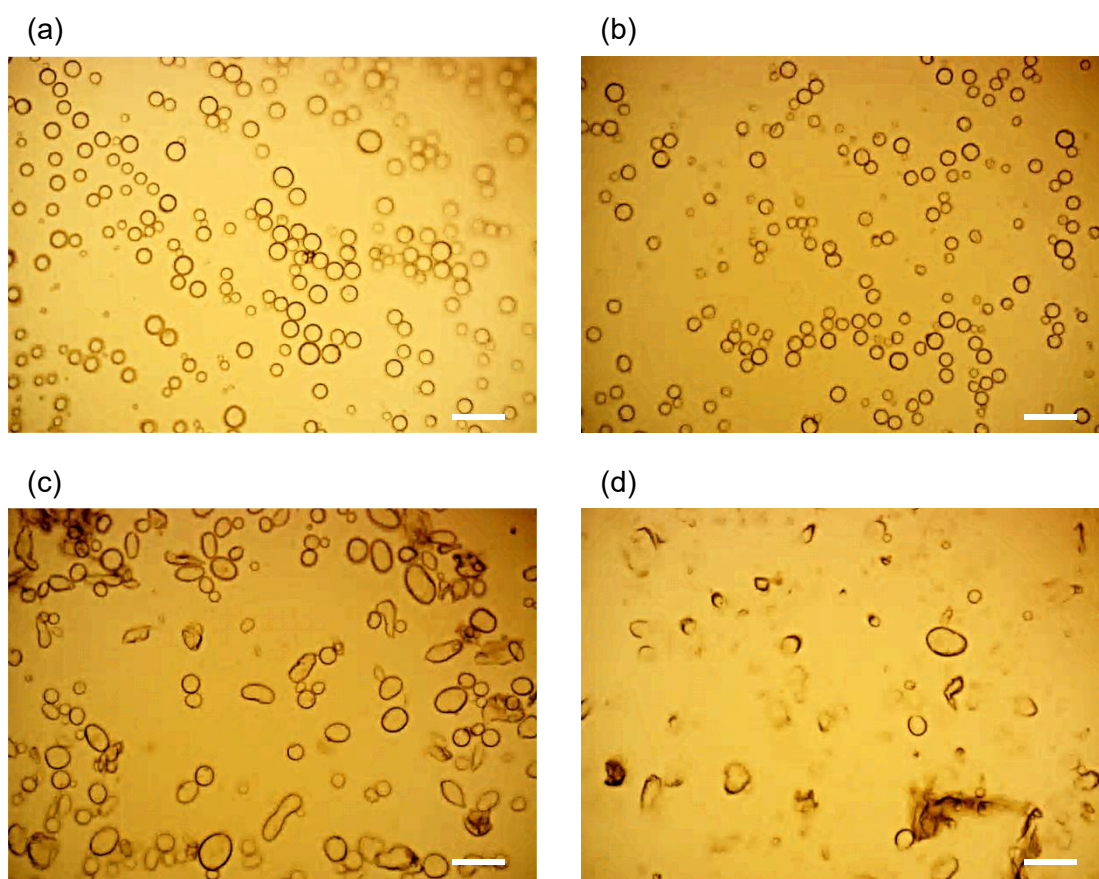

**Figure S1.** Microscopic image of Pickering emulsions: (a) deionised water as the aqueous phase; (b) 1.0 M H<sub>2</sub>SO<sub>4</sub> as the aqueous phase; (c) 1.0 M HCl as the aqueous phase; (d) 1.0 M HNO<sub>3</sub> as the aqueous phase; Scale bars: 200  $\mu$ m.

### 3. Substrate synthesis

Alcohols ( $\pm$ )-**1a**–**1m** were synthesised according to the following scheme. The obtained alcohol **1** was then subjected to (2*S*,3*R*)-HyperBTM-catalyzed kinetic resolution<sup>[3,6]</sup> to give optically active (*R*)-**1** and (*S*)-**3**.

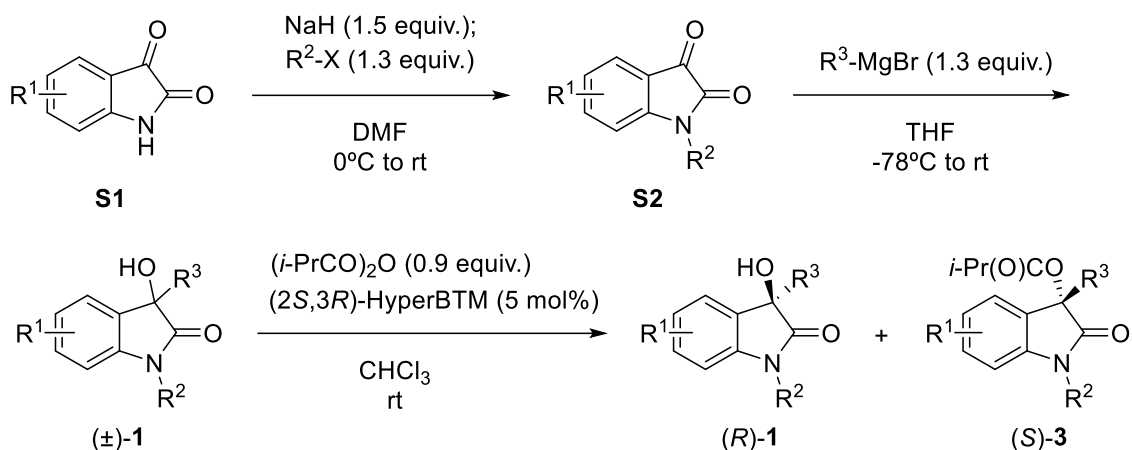

### Typical procedure

In a 100-mL flask, sodium hydride (60% dispersion in mineral oil, 600 mg, 15 mmol) was added to a solution of isatin derivatives **S1** (10 mmol) in DMF (40 mL) at 0 °C. The reaction solution was stirred at room temperature for 30 min. After that, alkyl halide ( $\text{R}^2\text{-X}$ , 12-15 mmol) was added dropwise to the solution. The resultant mixture was stirred at room temperature for 3 h. The reaction was quenched with water under 0 °C, and the reaction mixture was extracted with ethyl acetate (x3). The combined organic layers were dried over anhydrous sodium sulfate, filtrated, and evaporated in vacuo. The residue was purified by silica gel column chromatography to give N-substituted isatin **S2**.

In a 100-mL flask, N-substituted isatin **S2** was dissolved in THF, and the corresponding Grignard reagent ( $\text{R}^3\text{-MgBr}$ , 1.3 equiv) was added dropwise at -78 °C. the solution stirred at -78 °C for 30 min, then at 0 °C for 3-10 h. The reaction was quenched with aqueous ammonium chloride solution under 0 °C, and the reaction mixture was extracted with ethyl acetate (x3). The combined organic layers were dried over anhydrous sodium sulfate, filtrated, and evaporated in vacuo. The residue was purified by silica gel column chromatography to give alcohol ( $\pm$ )-**1**.

Alcohol ( $\pm$ )-**1** (1.0 mmol), isobutyric anhydride (150  $\mu\text{L}$ , 0.90 mmol) and (2*S*,3*R*)-HyperBTM (15 mg, 0.05 mmol) were dissolved in  $\text{CHCl}_3$  (10 mL). After stirring for 16 h, the reaction mixture was concentrated in vacuo. The residue was purified by silica gel column chromatography to give alcohol (*R*)-**1** and ester (*S*)-**3**. The enantiomeric excess of (*R*)-**1** was determined by HPLC analysis using chiral stationary phase. The spectroscopic data of (*R*)-**1** matched with those of racemised compounds, which are described in the next section.

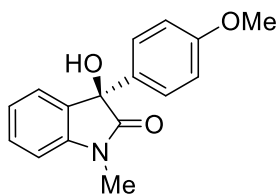

**(R)-3-Hydroxy-3-(4-methoxyphenyl)-1-methyloxindole ((R)-1a)**

98% ee; HPLC analysis DAICEL CHIRALPAK IE-3 (Hexane/*i*-PrOH = 80/20, 1.0 mL/min, 220 nm, 30°C)  $t_R$  17.9 min (*major*), 22.9 min (*minor*).

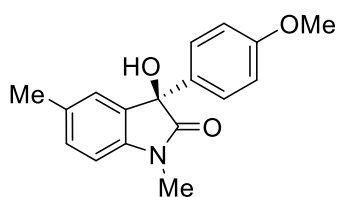

**(R)-3-Hydroxy-3-(4-methoxyphenyl)-1,5-dimethyloxindole ((R)-1b)**

99% ee; HPLC analysis DAICEL CHIRALPAK IF-3 (Hexane/*i*-PrOH = 80/20, 1.0 mL/min, 220 nm, 30°C)  $t_R$  13.5 min (*major*), 15.3 min (*minor*).

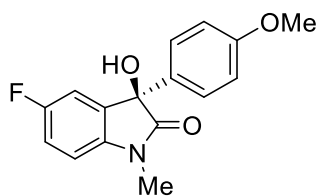

**(R)-5-Fluoro-3-hydroxy-3-(4-methoxyphenyl)-1-methyloxindole ((R)-1c)**

99% ee; HPLC analysis DAICEL CHIRALPAK IM-3 (Hexane/*i*-PrOH = 80/20, 1.0 mL/min, 220 nm, 30°C)  $t_R$  12.3 min (*major*), 18.6 min (*minor*).

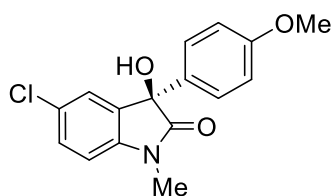

**(R)-5-Chloro-3-hydroxy-3-(4-methoxyphenyl)-1-methyloxindole ((R)-1d)**

99% ee; HPLC analysis DAICEL CHIRALPAK IC-3 (Hexane/*i*-PrOH = 80/20, 1.0 mL/min, 220 nm, 30°C)  $t_R$  17.0 (*major*), 20.3 min (*minor*).

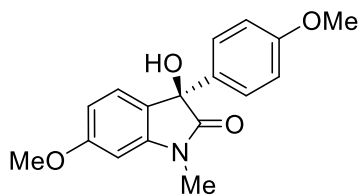

**(R)-3-Hydroxy-6-methoxy-3-(4-methoxyphenyl)-1-methyloxindole ((R)-1e)**

99% ee; HPLC analysis DAICEL CHIRALPAK IA-3 (Hexane/*i*-PrOH = 80/20, 1.0 mL/min, 220 nm, 30°C)  $t_R$  13.6 min (*minor*), 14.9 min (*major*).

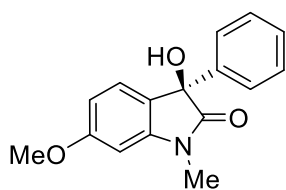

**(R)-3-Hydroxy-6-methoxy-1-methyl-3-phenyloxindole ((R)-1f)**

99% ee; HPLC analysis DAICEL CHIRALPAK IM-3 (Hexane/*i*-PrOH = 80/20, 1.0 mL/min, 220 nm, 30°C)  $t_R$  16.5 min (*major*), 23.0 min (*minor*).

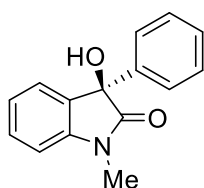

**(R)-3-Hydroxy-1-methyl-3-phenyloxindole ((R)-1g)**

99% ee; HPLC analysis DAICEL CHIRALPAK IC-3 (Hexane/*i*-PrOH = 80/20, 1.0 mL/min, 220 nm, 30°C)  $t_R$  12.4 min (*minor*), 16.3 min (*major*).

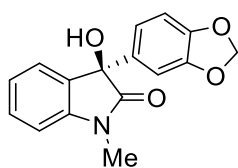

**(R)-3-(Benzo[d][1,3]dioxo-5-yl)-3-hydroxy-1-methyloxindole ((R)-1h)**

99% ee; HPLC analysis DAICEL CHIRALPAK IE-3 (Hexane/*i*-PrOH = 80/20, 1.0 mL/min, 220 nm, 30°C)  $t_R$  21.0 min (*major*), 27.1 min (*minor*).

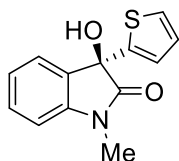

**(R)-3-Hydroxy-1-methyl-3-(thiophen-2-yl)oxindole ((R)-1i)**

58% ee; HPLC analysis DAICEL CHIRALPAK IM-3 (Hexane/*i*-PrOH = 80/20, 1.0 mL/min, 220 nm, 30°C)  $t_R$  13.0 min (*major*), 15.3 min (*minor*).

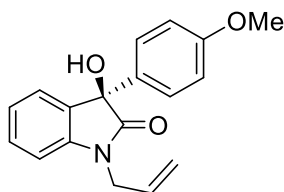

**(R)-1-Allyl-3-hydroxy-3-(4-methoxyphenyl)oxindole ((R)-1k)**

99% ee; HPLC analysis DAICEL CHIRALPAK IE-3 (Hexane/*i*-PrOH = 80/20, 1.0 mL/min, 220 nm, 30°C)  $t_R$  12.6 min (*major*), 16.1 min (*major*).

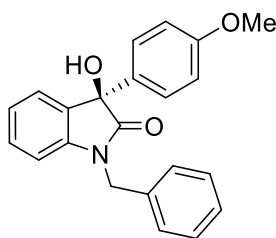

**(R)-1-Benzyl-3-hydroxy-3-(4-methoxyphenyl)oxindole ((R)-1l)**

99% ee; HPLC analysis DAICEL CHIRALPAK IE-3 (Hexane/*i*-PrOH = 80/20, 1.0 mL/min, 220 nm, 30°C)  $t_R$  21.2 (*major*), 26.4 min (*minor*).

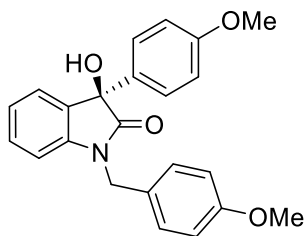

**(R)-3-Hydroxy-1-(4-methoxybenzyl)-3-(4-methoxyphenyl)oxindole ((R)-1m)**

71% ee; HPLC analysis DAICEL CHIRALPAK IF-3 (Hexane/*i*-PrOH = 80/20, 1.0 mL/min, 220 nm, 30°C),  $t_R$  22.7 min (*major*), 27.4 min (*minor*).

#### 4. Racemisation in Pickering emulsion

##### General procedure

A Pickering emulsion was prepared in a screw-capped vial ( $\phi = 15$  mm) by mixing methyl-modified silica nanoparticles (60 mg), aqueous sulfuric acid (1.0–5.0 M, 600  $\mu$ L), and *n*-octane (2.0 mL) at 20,000 rpm for 90 sec using a T10 basic ULTRA-TURRAX homogenizer (IKA) equipped with a S10N-5G Dispersing tool ( $\phi = 5$  mm). After the supernatant organic layer was removed, toluene (1.2 mL) containing (*R*)-**1** (0.10 mmol) was gently added to the vial. The vial was stood in an incubator at corresponding temperature without stirring. After 18 h, the reaction mixture was diluted with ethyl acetate and neutralised by solid sodium hydrogen carbonate. The resulting mixture was dried over anhydrous magnesium sulfate, filtrated, and evaporated. The residue was purified by short-path silica gel column chromatography to give racemised alcohol **1**. The  $^1\text{H}$  NMR spectra of ( $\pm$ )-**1a**, ( $\pm$ )-**1b**, ( $\pm$ )-**1d**, ( $\pm$ )-**1g**, ( $\pm$ )-**1h**, ( $\pm$ )-**1i**, ( $\pm$ )-**1k** and ( $\pm$ )-**1l** were in good agreement with those reported in the literature. Compounds ( $\pm$ )-**1c**, ( $\pm$ )-**1e**, ( $\pm$ )-**1f** and ( $\pm$ )-**1m** were fully characterized by  $^1\text{H}$  and  $^{13}\text{C}$  NMR, and HRMS because they are not reported in the literature.

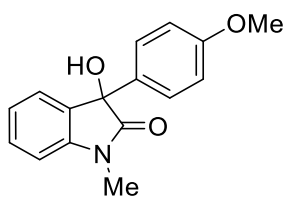

##### ( $\pm$ )-3-Hydroxy-3-(4-methoxyphenyl)-1-methylindole (( $\pm$ )-**1a**)<sup>[3]</sup>

colourless solid, 26.1 mg (97% yield);  $^1\text{H}$  NMR (500 MHz,  $\text{CDCl}_3$ )  $\delta$  7.37-7.30 (m, 4H), 7.10 (t,  $J = 7.5$  Hz, 1H), 6.90 (d,  $J = 7.7$  Hz, 1H), 6.85 (d,  $J = 8.9$  Hz, 2H), 3.78 (s, 3H), 3.30 (s, 1H), 3.24 (s, 3H).

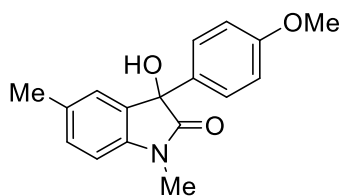

##### ( $\pm$ )-3-Hydroxy-3-(4-methoxyphenyl)-1,5-dimethylindole (( $\pm$ )-**1b**)<sup>[4]</sup>

pale-yellow solid, 24.4 mg (85% yield);  $^1\text{H}$  NMR (500 MHz,  $\text{CDCl}_3$ )  $\delta$  7.34-7.31 (m, 2H), 7.15-7.12 (m, 2H), 6.87-6.84 (m, 2H), 6.79 (d,  $J = 7.9$  Hz, 1H), 3.78 (s, 3H), 3.23 (s, 3H), 3.10 (s, 1H), 2.31 (s, 3H).

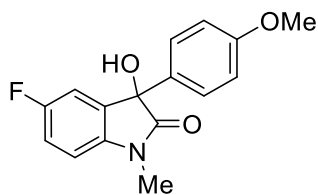

**(±)-5-Fluoro-3-hydroxy-3-(4-methoxyphenyl)-1-methyloxindole ((±)-1c)**

colourless solid, 27.2 mg (95% yield);  $^1\text{H NMR}$  (500 MHz,  $\text{CDCl}_3$ )  $\delta$  7.34-7.29 (m, 2H), 7.06-7.03 (m, 2H), 6.86 (d,  $J = 8.9$  Hz, 2H), 6.83 (dd,  $J = 9.2, 3.9$  Hz, 1H), 3.78 (s, 3H), 3.36 (s, 1H), 3.23 (s, 3H);  $^{13}\text{C NMR}$  (126 MHz,  $\text{CDCl}_3$ )  $\delta$  177.7, 160.2, 158.9, 158.3, 138.9, 138.9, 135.1, 135.0, 133.5, 129.4, 114.6, 114.4, 113.9, 113.7, 109.0, 109.0, 61.5, 61.5, 55.2, 26.7;  $^{19}\text{F NMR}$  (471 MHz,  $\text{CDCl}_3$ )  $\delta$  -119.1 (td,  $J = 8.3, 4.0$  Hz); HRMS (ESI)  $m/z$  calcd. for  $\text{C}_{16}\text{H}_{14}\text{FNO}_3\text{Na}$   $[\text{M}+\text{Na}]^+$ : 310.0849, found: 310.0849.

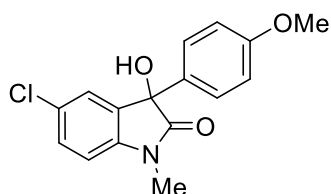

**(±)-5-Chloro-3-hydroxy-3-(4-methoxyphenyl)-1-methyloxindole ((±)-1d)**<sup>[4]</sup>

yellow solid, 28.0 mg (92% yield);  $^1\text{H NMR}$  (500 MHz,  $\text{CDCl}_3$ )  $\delta$  7.33-7.27 (m, 4H), 6.88-6.85 (m, 2H), 6.82 (d,  $J = 8.3$  Hz, 1H), 3.79 (s, 3H), 3.39 (s, 1H), 3.23 (s, 3H).

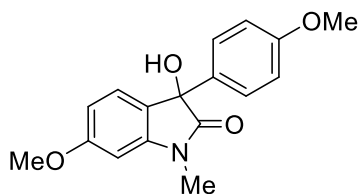

**(±)-3-Hydroxy-6-methoxy-3-(4-methoxyphenyl)-1-methyloxindole ((±)-1e)**

colourless solid, 29.9 mg (>99% yield);  $^1\text{H NMR}$  (500 MHz,  $\text{CDCl}_3$ )  $\delta$  7.33-7.30 (m, 2H), 7.21 (d,  $J = 8.2$  Hz, 1H), 6.86-6.83 (m, 2H), 6.58 (dd,  $J = 8.2, 2.2$  Hz, 1H), 6.47 (d,  $J = 2.2$  Hz, 1H), 3.84 (s, 3H), 3.78 (s, 3H), 3.21 (s, 3H), 3.01 (s, 1H);  $^{13}\text{C NMR}$  (126 MHz,  $\text{CDCl}_3$ )  $\delta$  178.2, 161.6, 159.7, 145.1, 132.5, 127.0, 125.9, 123.7, 114.1, 107.1, 96.9, 55.7, 55.4, 26.6; HRMS (ESI)  $m/z$  calcd. for  $\text{C}_{17}\text{H}_{17}\text{NO}_4\text{Na}$   $[\text{M}+\text{Na}]^+$ : 322.1050, found: 322.1050.

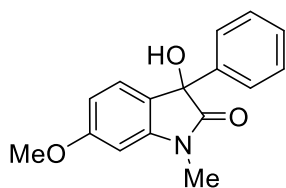

**(±)-3-Hydroxy-6-methoxy-1-methyl-3-phenyloxindole ((±)-1f)**

colourless solid, 25.3 mg (94% yield); <sup>1</sup>H NMR (500 MHz, CDCl<sub>3</sub>) δ 7.39-7.37 (m, 2H), 7.34-7.27 (m, 3H), 7.19 (d, *J* = 8.2 Hz, 1H), 6.57 (dd, *J* = 8.2, 2.3 Hz, 1H), 6.49 (d, *J* = 2.1 Hz, 1H), 3.84 (s, 3H), 3.24 (s, 3H), 3.06 (s, 1H); <sup>13</sup>C NMR (126 MHz, CDCl<sub>3</sub>) δ 178.1, 161.3, 144.9, 140.5, 128.4, 128.0, 125.8, 125.5, 123.9, 107.0, 96.7, 77.7, 55.6, 26.4; HRMS (ESI) *m/z* calcd. for C<sub>16</sub>H<sub>15</sub>NO<sub>3</sub>Na [M+Na]<sup>+</sup>: 292.0944, found: 292.0946.

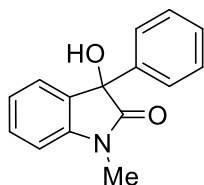

**(±)-3-Hydroxy-1-methyl-3-phenyloxindole ((±)-1g)** <sup>[3]</sup>

pale-yellow solid, 23.9 mg (>99% yield); <sup>1</sup>H NMR (500 MHz, CDCl<sub>3</sub>) δ 7.40-7.28 (m, 7H), 7.09 (td, *J* = 7.5, 0.9 Hz, 1H), 6.91 (d, *J* = 7.9 Hz, 1H), 3.27 (s, 1H), 3.26 (s, 3H).

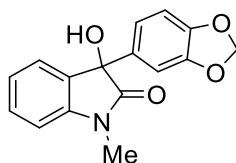

**(±)-3-(Benzo[d][1,3]dioxo-5-yl)-3-hydroxy-1-methyloxindole ((±)-1h)** <sup>[5]</sup>

colourless solid, 22.9 mg (81% yield); <sup>1</sup>H NMR (500 MHz, CDCl<sub>3</sub>) δ 7.35 (td, *J* = 7.8, 1.2 Hz, 1H), 7.29 (dd, *J* = 7.4, 1.1 Hz, 1H), 7.10 (td, *J* = 7.6, 0.9 Hz, 1H), 6.91-6.89 (m, 2H), 6.83 (dd, *J* = 8.1, 1.8 Hz, 1H), 6.73 (d, *J* = 8.2 Hz, 1H), 5.93 (q, *J* = 1.6 Hz, 2H), 3.28 (s, 1H), 3.24 (s, 3H).

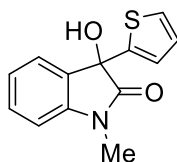

**(±)-3-Hydroxy-1-methyl-3-(thiophen-2-yl)oxindole ((±)-1i)** <sup>[3]</sup>

pale-yellow solid, 23.3 mg (95% yield); <sup>1</sup>H NMR (500 MHz, CDCl<sub>3</sub>) δ 7.53 (d, *J* = 7.3 Hz, 1H), 7.38 (t, *J* = 7.7 Hz, 1H), 7.31 (dd, *J* = 5.0, 1.1 Hz, 1H), 7.15 (t, *J* = 7.5 Hz, 1H), 6.98 (d, *J* = 7.7 Hz, 1H), 6.93 (dd, *J* = 4.9, 3.7 Hz, 1H), 6.89 (d, *J* = 7.7 Hz, 1H), 3.66 (s, 1H), 3.22 (s, 3H).

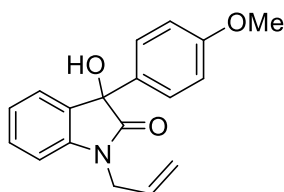

**(±)-1-Allyl-3-hydroxy-3-(4-methoxyphenyl)oxindole ((±)-1k)** <sup>[6]</sup>

colourless solid, 29.5 mg (>99% yield); <sup>1</sup>H NMR (500 MHz, CDCl<sub>3</sub>) δ 7.35-7.29 (m, 4H), 7.08 (td, *J* = 7.5, 0.9 Hz, 1H), 6.90-6.88 (m, 1H), 6.88-6.85 (m, 2H), 5.90-5.82 (m, 1H), 5.28-5.23 (m, 2H), 4.45 (dtd, *J* = 16.3, 3.4, 1.7 Hz, 1H), 4.27 (dtd, *J* = 16.3, 3.4, 1.7 Hz, 1H), 3.78 (s, 3H), 3.23 (s, 1H).

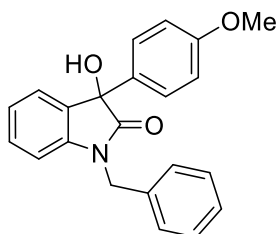

**(±)-1-Benzyl-3-hydroxy-3-(4-methoxyphenyl)oxindole ((±)-1l)** <sup>[7]</sup>

pale-yellow solid, 25.2 mg (73% yield); <sup>1</sup>H NMR (500 MHz, CDCl<sub>3</sub>) δ 7.36-7.27 (m, 8H), 7.22 (td, *J* = 7.8, 1.2 Hz, 1H), 7.05 (td, *J* = 7.6, 0.8 Hz, 1H), 6.89-6.86 (m, 2H), 6.77 (d, *J* = 7.8 Hz, 1H), 5.04 (d, *J* = 15.6 Hz, 1H), 4.83 (d, *J* = 15.6 Hz, 1H), 3.79 (s, 3H), 3.25 (s, 1H).

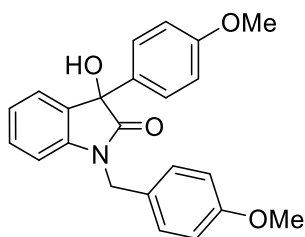

**(±)-3-Hydroxy-1-(4-methoxybenzyl)-3-(4-methoxyphenyl)oxindole ((±)-1m)**

pale-yellow solid, 37.1 mg (99% yield); <sup>1</sup>H NMR (500 MHz, CDCl<sub>3</sub>) δ 7.35-7.32 (m, 2H), 7.29 (dd, *J* = 7.5, 0.7 Hz, 1H), 7.25-7.21 (m, 3H), 7.05 (td, *J* = 7.5, 1.0 Hz, 1H), 6.89-6.83 (m, 4H), 6.80 (d, *J* = 7.9 Hz, 1H), 4.96 (d, *J* = 15.3 Hz, 1H), 4.77 (d, *J* = 15.3 Hz, 1H), 3.79 (s, 3H), 3.78 (s, 3H), 3.20 (d, *J* = 1.0 Hz, 1H); <sup>13</sup>C NMR (126 MHz, CDCl<sub>3</sub>) δ 177.8, 159.7, 159.3, 142.7, 132.3, 131.8, 129.8, 128.8, 127.6, 126.9, 125.1, 123.6, 114.4, 114.2, 109.9, 77.7, 55.4, 55.4, 43.6; HRMS (ESI) *m/z* calcd. for C<sub>23</sub>H<sub>21</sub>NO<sub>4</sub>Na [M+Na]<sup>+</sup>: 398.1358, found: 398.1362.

### Large-scale experiment

A Pickering emulsion was prepared in a 250-mL beaker by mixing methyl-modified silica nanoparticles (1.8 g), aqueous sulfuric acid (5.0 M, 18 mL), and *n*-octane (60 mL) at 20,000 rpm for 90 sec using a T10 basic ULTRA-TURRAX homogenizer (IKA) equipped with a S10N-8G Dispersing tool ( $\phi = 8$  mm). After the supernatant organic layer was removed, toluene (36 mL) containing (*R*)-**1a** (3.0 mmol, 808 mg) was gently added to the beaker. The beaker was stood in an incubator at 50°C without stirring. After 18 h, the reaction mixture was diluted with diethyl ether and naturalized by aqueous sodium hydrogen carbonate solution. The resulting mixture was extracted with ethyl acetate (10 mL x3). The combined organic layers were dried over anhydrous sodium sulfate, filtrated, and evaporated in vacuo. The residue was purified by short-path silica gel column chromatography to give racemised alcohol ( $\pm$ )-**1a** (736 mg, 91% yield, <1% ee).

### 5. Dynamic kinetic resolution in Pickering emulsion

A Pickering emulsion was prepared in a screw-capped vial ( $\phi = 15$  mm) by mixing methyl-modified silica nanoparticles (20 mg), aqueous sulfuric acid (5.0 M, 0.2 mL), and *n*-octane (1.0 mL) at 20,000 rpm for 90 sec using a T10 basic ULTRA-TURRAX homogenizer (IKA) equipped with a S10N-5G Dispersing tool ( $\phi = 5$  mm). After the supernatant organic layer was removed, toluene (600  $\mu$ L) containing ( $\pm$ )-**1e** (0.10 mmol) and isobutyric anhydride **2** (100  $\mu$ L, 0.60 mmol) was gently added to the vial. Sodium isobutyrate (50 mg) and molecular sieves 4 Å (powder, 50 mg) were placed on top of the emulsion to cover the droplets, followed by addition of (2*S*,3*R*)-HyperBTM (3.0 mg, 10 mol%). The vial was stood in an incubator at 25 °C without stirring. After 2 h, the reaction mixture was diluted with chloroform and neutralised by solid sodium hydrogen carbonate. The resulting mixture was dried over anhydrous magnesium sulfate, filtrated, and evaporated. The residue was purified by silica gel column chromatography to give ester (*S*)-**3e** (21.4 mg, 58% yield, 97% ee) and the recovered alcohol **1e** (7.6 mg, 28% yield, 62% ee). The absolute configuration of **3e** was assigned as *S* based on the previously reported HyperBTM catalyzed kinetic resolution of isatin derivatives.<sup>[3,6]</sup>

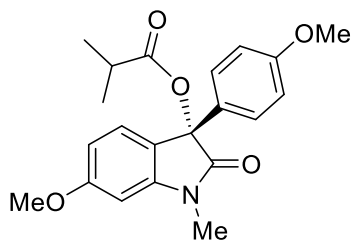

**(S)-6-Methoxy-3-(4-methoxyphenyl)-1-methyl-2-oxoindolin-3-yl isobutyrate ((S)-3e)**

pale-yellow oil, 21.4 mg (58% yield); 97% ee; optical rotation  $[\alpha]_{\text{D}}^{27} = +72.2$  ( $c$  1.0,  $\text{CHCl}_3$ ); HPLC analysis DAICEL CHIRALPAK IA-3 (Hexane/*i*-PrOH = 80/20, 1.0 mL/min, 220 nm, 30°C)  $t_{\text{R}}$  6.0 min (*major*), 7.4 min (*minor*); 97% ee;  $^1\text{H}$  NMR (500 MHz,  $\text{CDCl}_3$ )  $\delta$  7.33-7.30 (m, 2H), 7.19 (d,  $J = 8.2$  Hz, 1H), 6.84-6.81 (m, 2H), 6.64 (dd,  $J = 8.2, 2.3$  Hz, 1H), 6.49 (d,  $J = 2.3$  Hz, 1H), 3.87 (s, 3H), 3.77 (s, 3H), 3.19 (s, 6H);  $^{13}\text{C}$  NMR (126 MHz,  $\text{CDCl}_3$ )  $\delta$  176.0, 161.7, 159.7, 146.0, 130.9, 128.0, 126.8, 119.5, 113.8, 106.9, 96.6, 83.4, 55.7, 55.4, 53.0, 26.4; HRMS (ESI)  $m/z$  calcd. for  $\text{C}_{21}\text{H}_{23}\text{NO}_5\text{Na}$   $[\text{M}+\text{Na}]^+$ : 392.1468, found: 392.1465.

## 6. References

- [1] H. Yang, L. Fu, L. Wei, J. Liang and B. P. Binks, *J. Am. Chem. Soc.*, 2015, **137**, 1362–1371.
- [2] W. Stöber, A. Fink and E. Bohn, *J. Colloid Interface Sci.*, 1968, **26**, 62–69.
- [3] S. M. Smith, M. D. Greenhalgh, T. Feoktistova, D. M. Walden, J. E. Taylor, D. B. Cordes, A. M. Z. Slawin, P. H.-Y. Cheong and A. D. Smith, *Eur. J. Org. Chem.*, 2022, **2022**, e202101111.
- [4] Y.-Y. Liao, L. Xu, R.-Y. Tang and W.-Y. Zheng, *Synthesis*, 2018, **50**, 4645–4650.
- [5] A. Nasim, G. T. Thomas, J. S. Ovens and S. G. Newman, *Org. Lett.*, 2022, **24**, 7232–7236.
- [6] M. D. Greenhalgh, S. M. Smith, D. M. Walden, J. E. Taylor, Z. Brice, E. R. T. Robinson, C. Fallan, D. B. Cordes, A. M. Z. Slawin, H. C. Richardson, M. A. Grove, P. H.-Y. Cheong and A. D. Smith, *Angew. Chem. Int. Ed.*, 2018, **57**, 3200–3206.
- [7] G. R. Boyce, S. F. Musolino, J. Yang, A. D. Smith and J. E. Taylor, *J. Org. Chem.*, 2022, **87**, 13367–13374.

## 7. NMR and HPLC charts

### (±)-3-Hydroxy-3-(4-methoxyphenyl)-1-methyloxindole ((±)-1a)

<sup>1</sup>H NMR

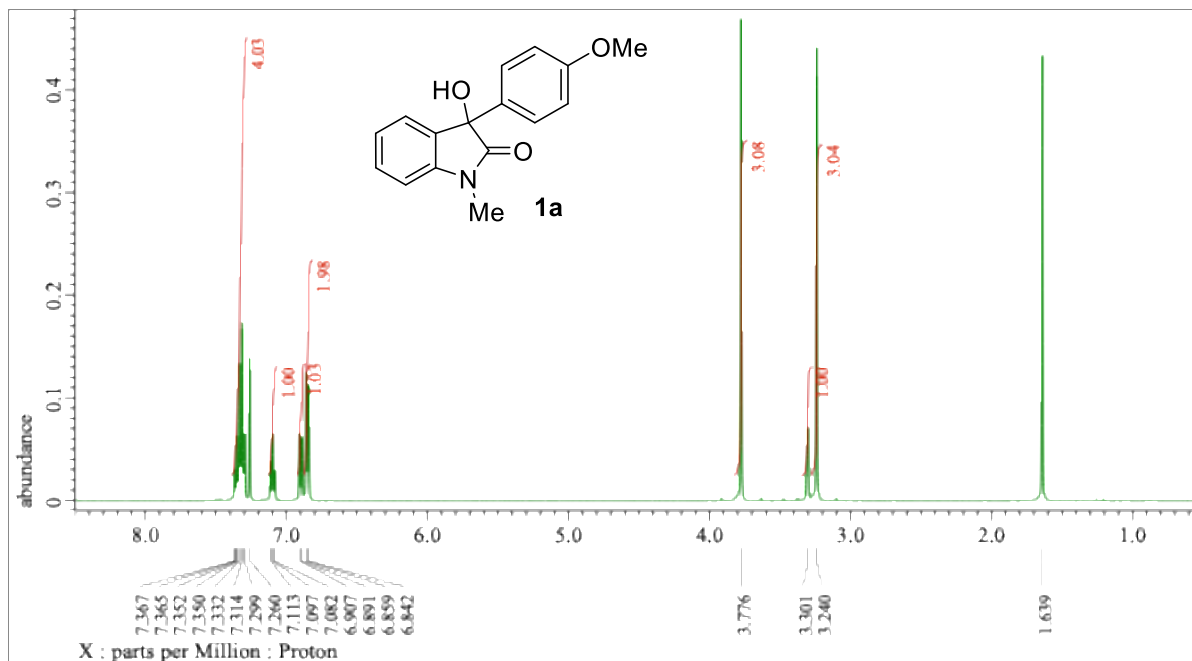

### (±)-3-Hydroxy-3-(4-methoxyphenyl)-1,5-dimethyloxindole ((±)-1b)

<sup>1</sup>H NMR

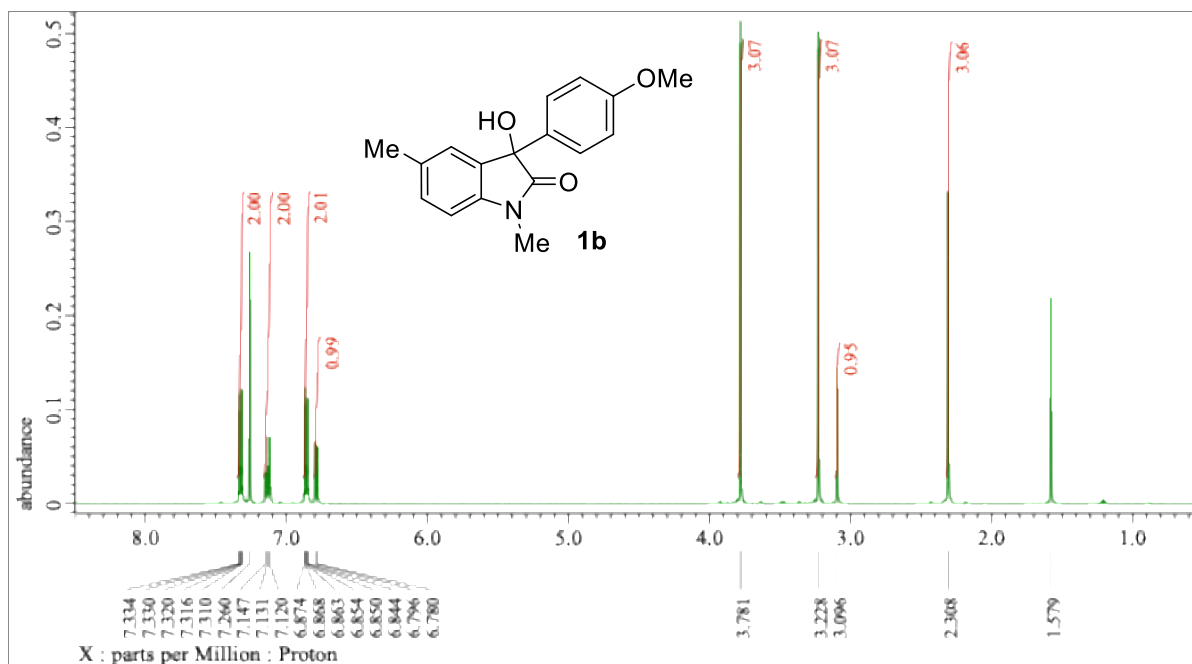

(±)-5-Fluoro-3-hydroxy-3-(4-methoxyphenyl)-1-methylindole ((±)-1c)

<sup>1</sup>H NMR

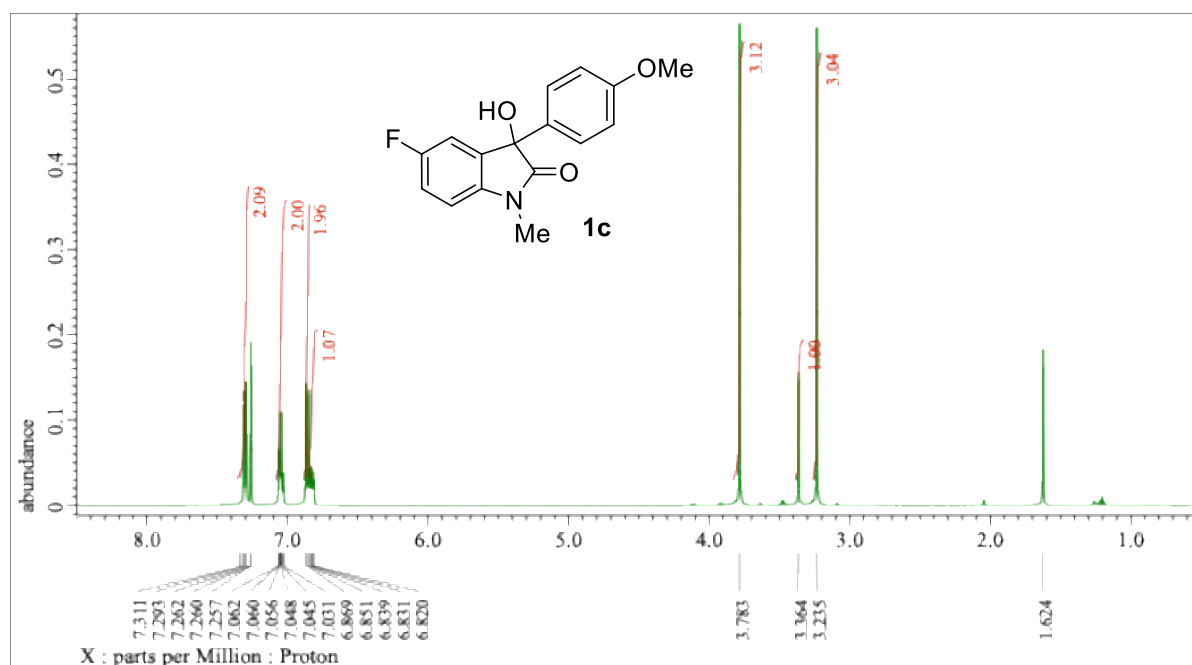

<sup>13</sup>C NMR

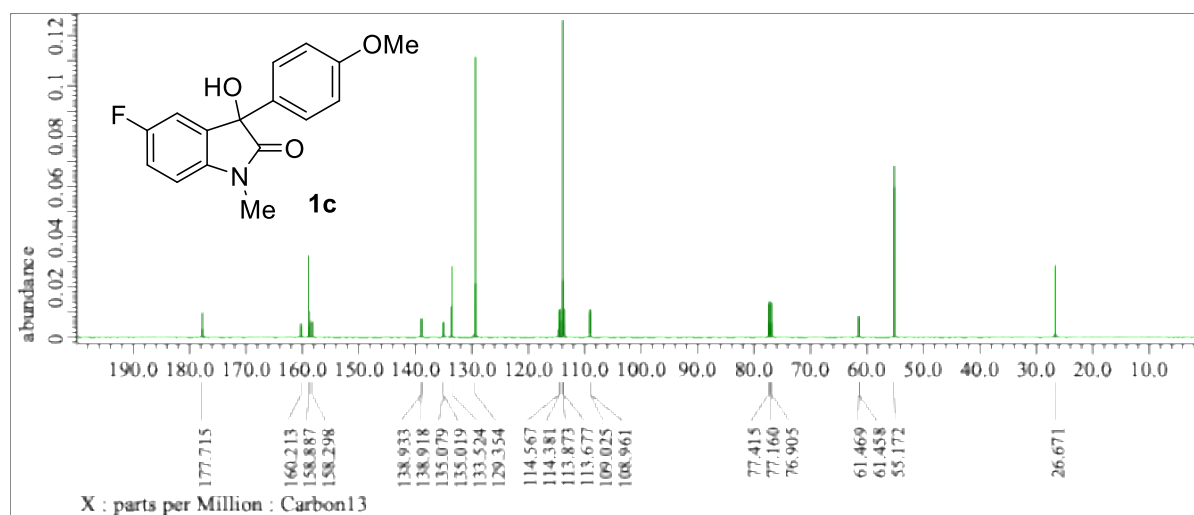

$^{19}\text{F}$  NMR

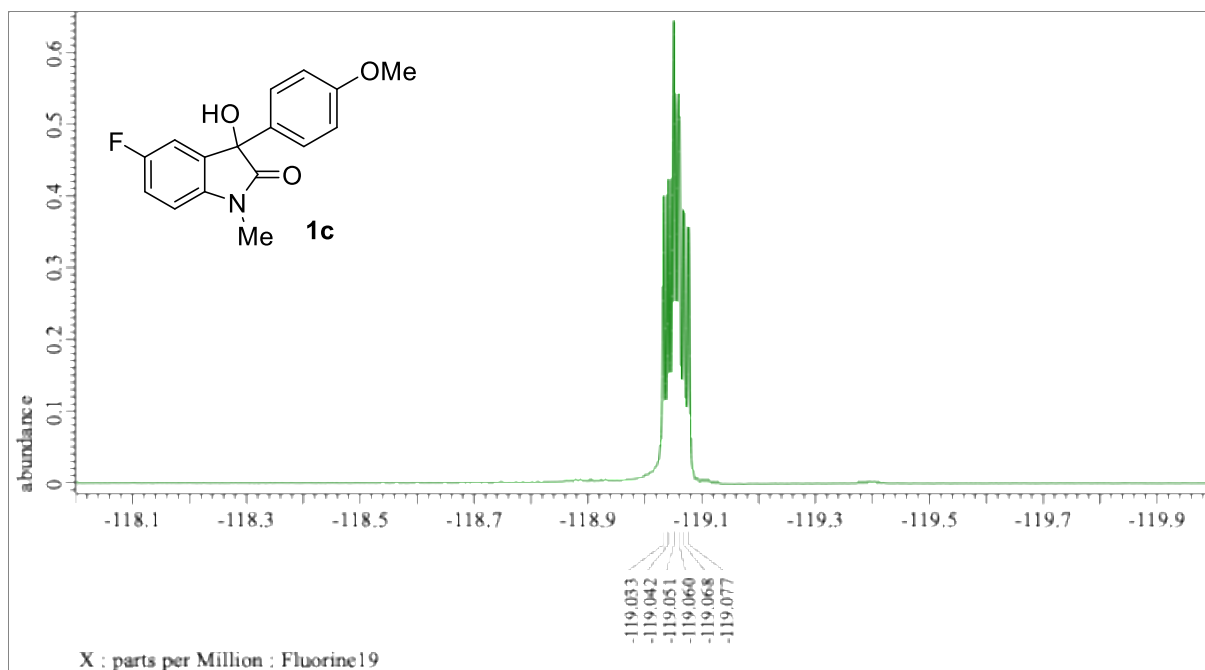

(±)-5-Chloro-3-hydroxy-3-(4-methoxyphenyl)-1-methylindole ((±)-**1d**)

$^1\text{H}$  NMR

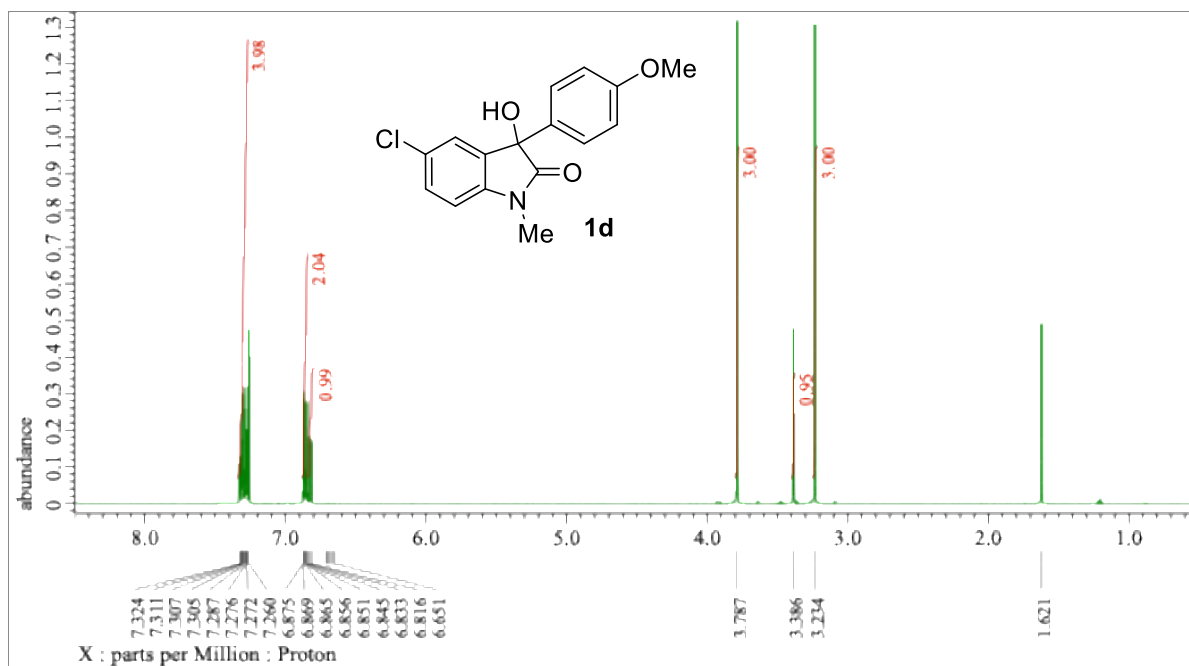

(±)-3-Hydroxy-6-methoxy-3-(4-methoxyphenyl)-1-methylindole ((±)-1e)

<sup>1</sup>H NMR

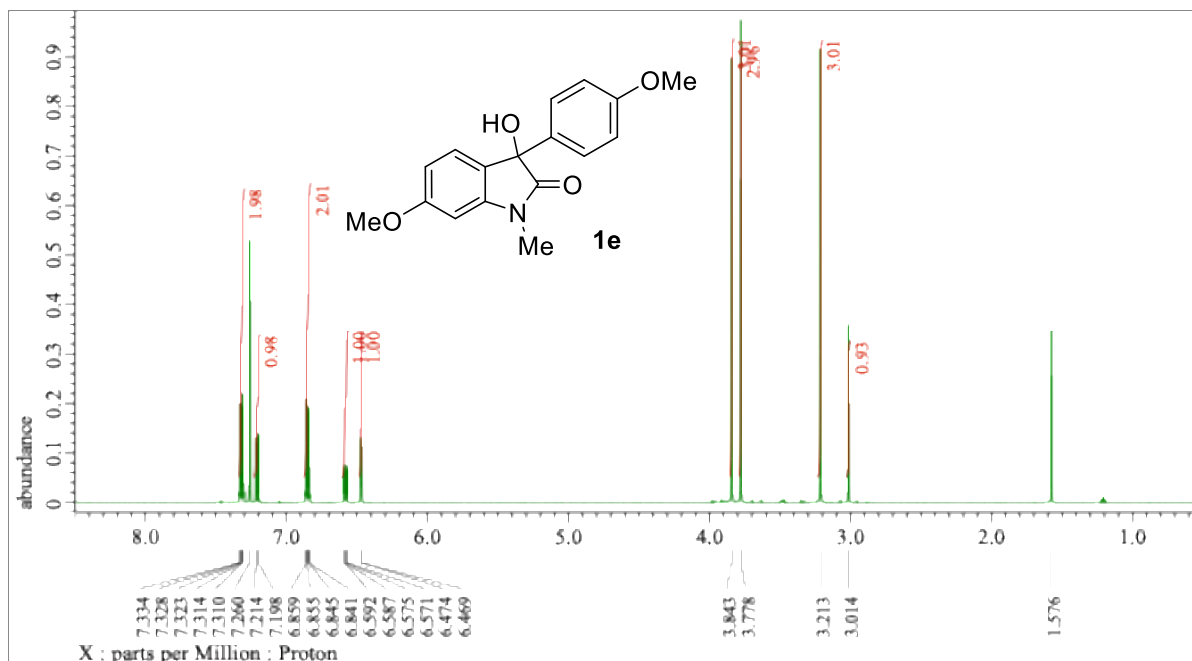

<sup>13</sup>C NMR

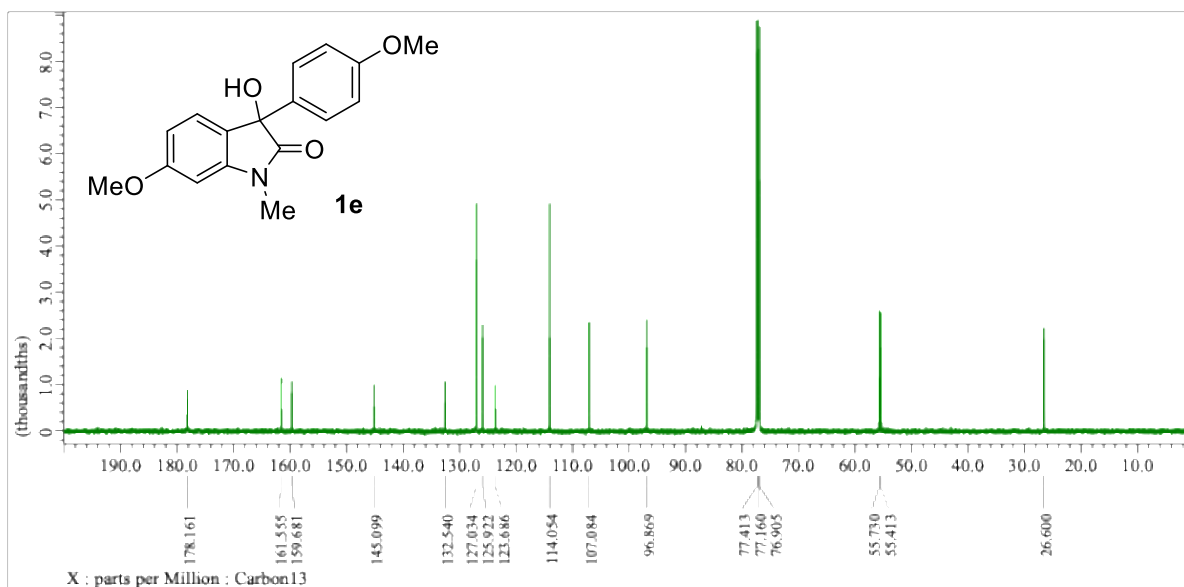

(±)-3-Hydroxy-6-methoxy-1-methyl-3-phenylindole ((±)-1f)

<sup>1</sup>H NMR

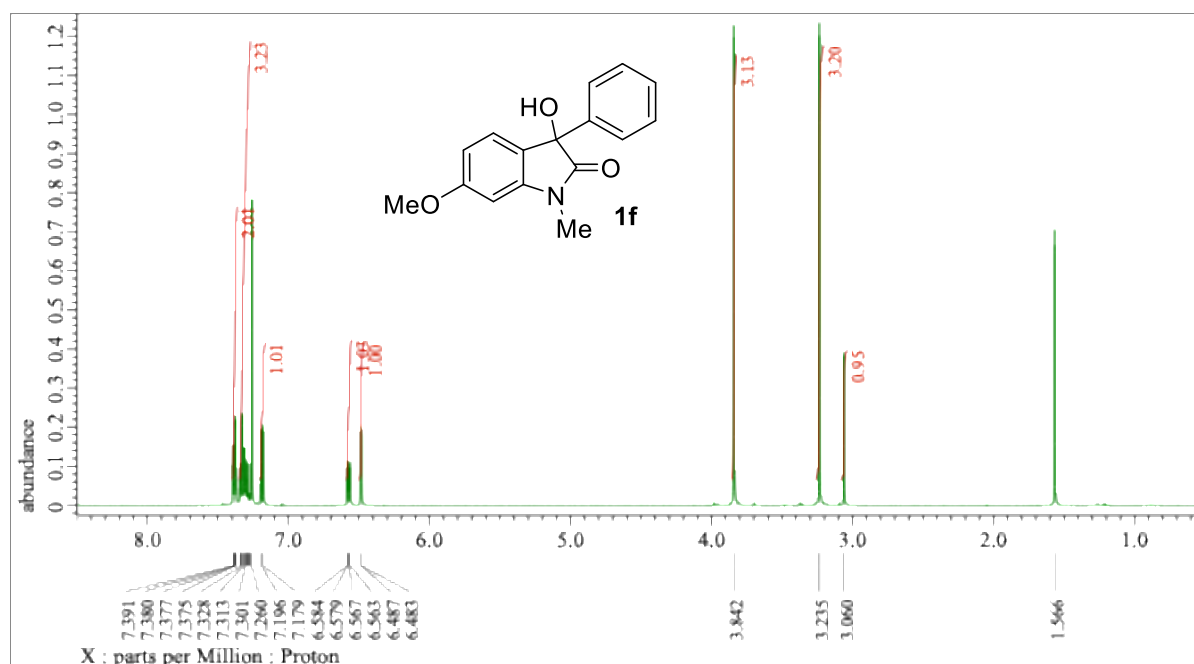

<sup>13</sup>C NMR

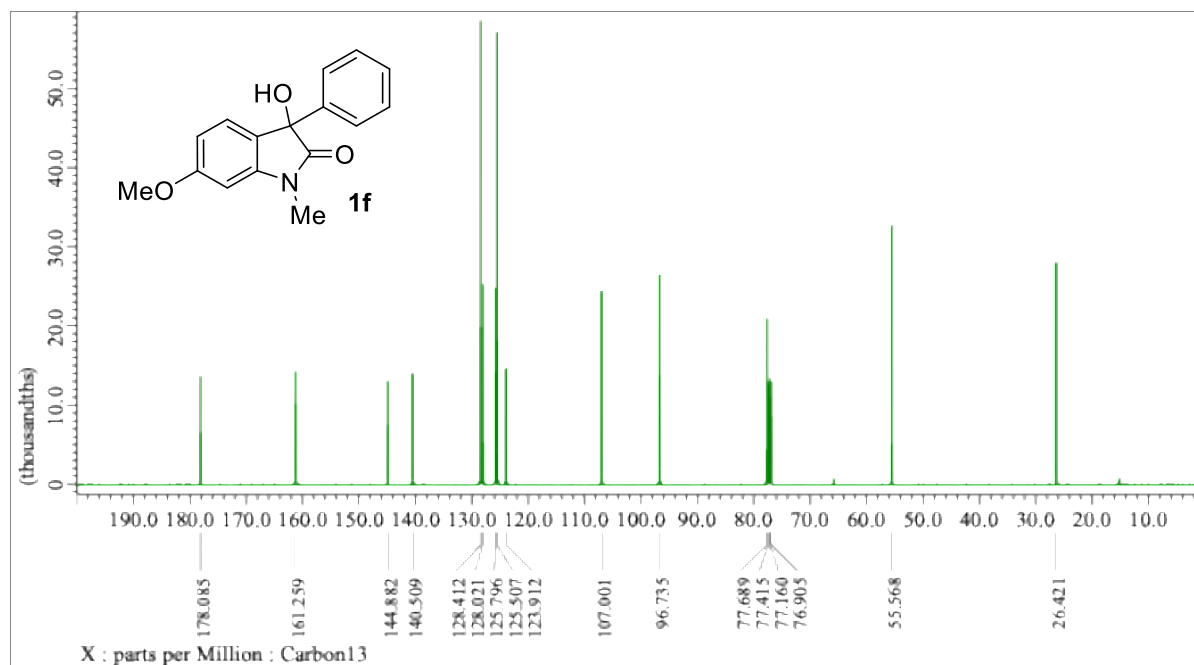

**(±)-3-Hydroxy-1-methyl-3-phenyloxindole ((±)-1g)**

<sup>1</sup>H NMR

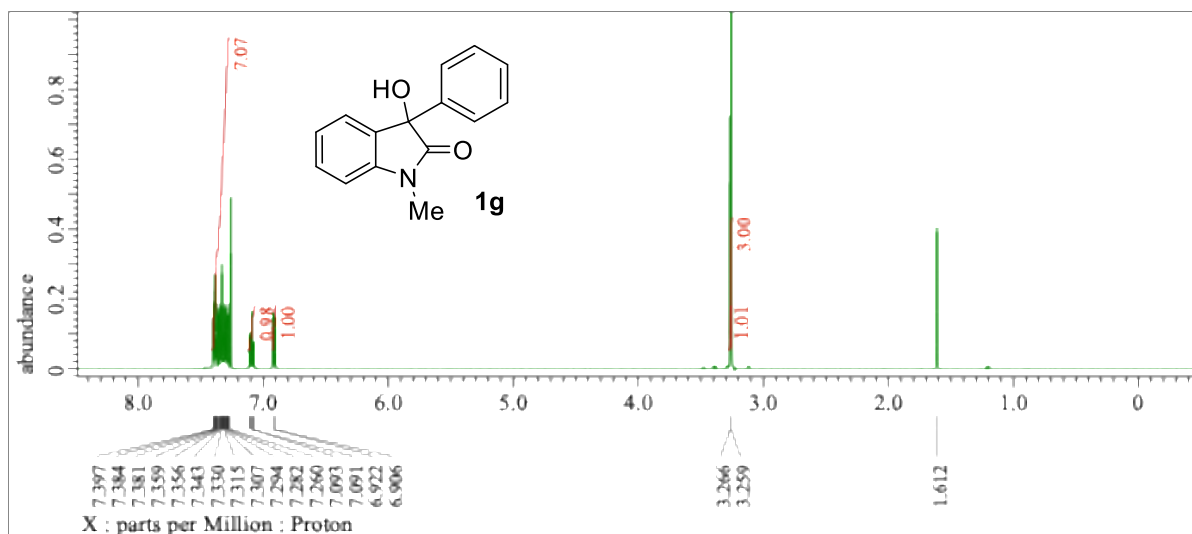

**(±)- 3-(Benzo[d][1,3]dioxo-5-yl)-3-hydroxy-1-methyloxindole ((±)-1h)**

<sup>1</sup>H NMR

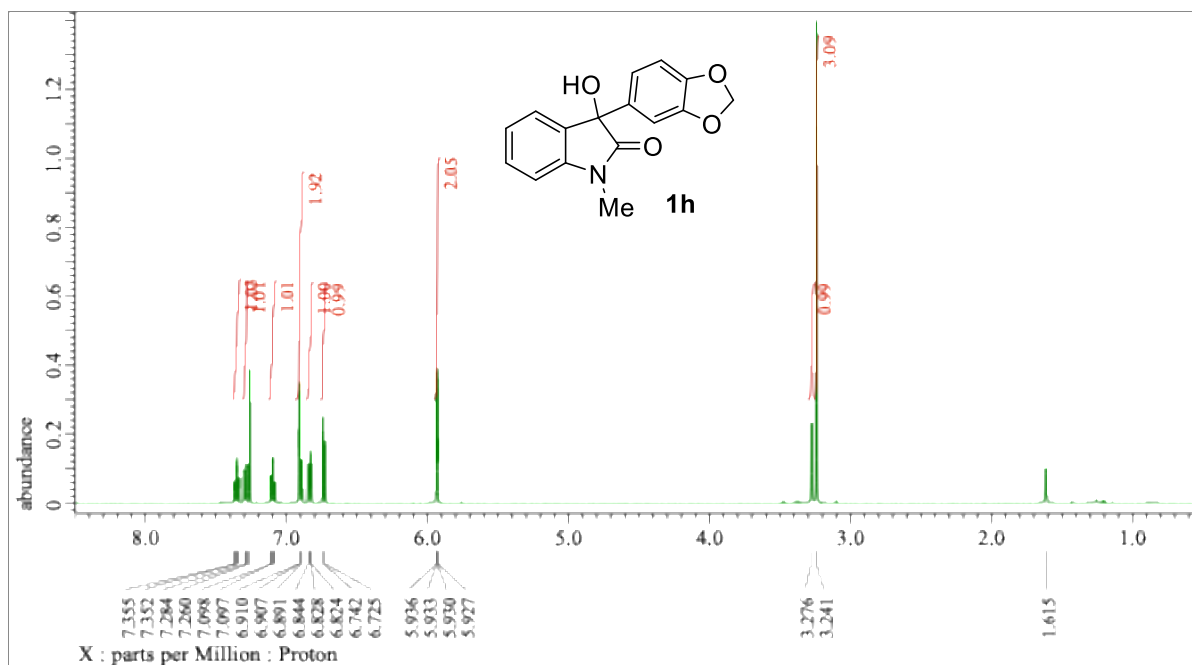

(±)- 3-Hydroxy-1-methyl-3-(thiophen-2-yl)oxindole ((±)-1i)

<sup>1</sup>H NMR

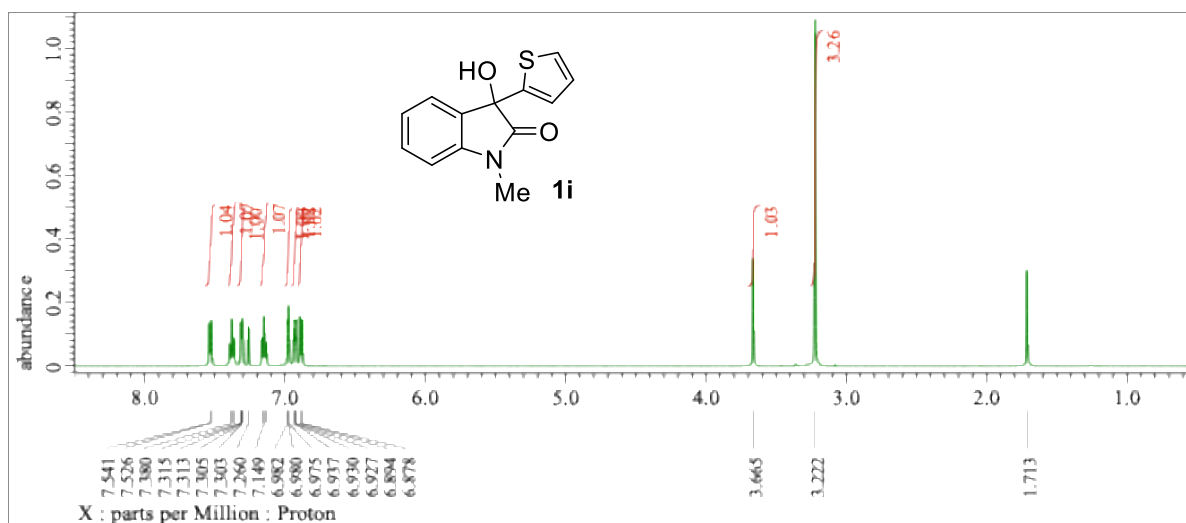

(±)-1-Allyl-3-hydroxy-3-(4-methoxyphenyl)oxindole ((±)-1k)

<sup>1</sup>H NMR

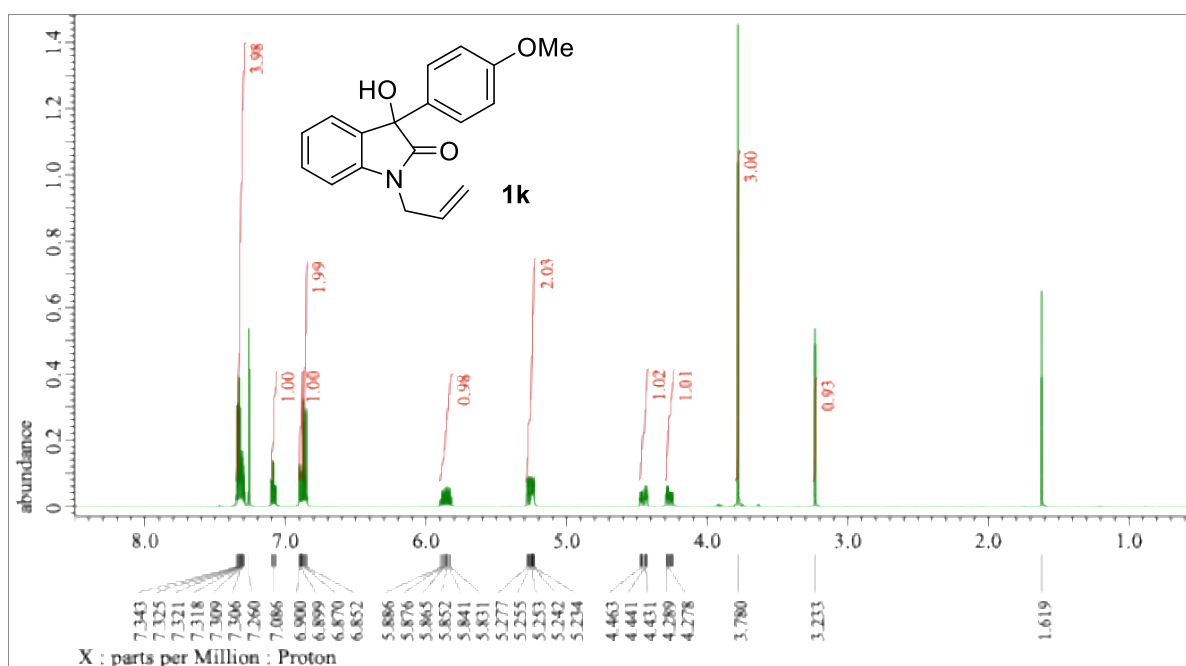

**(±)-1-Benzyl-3-hydroxy-3-(4-methoxyphenyl)oxindole ((±)-1l)**

<sup>1</sup>H NMR

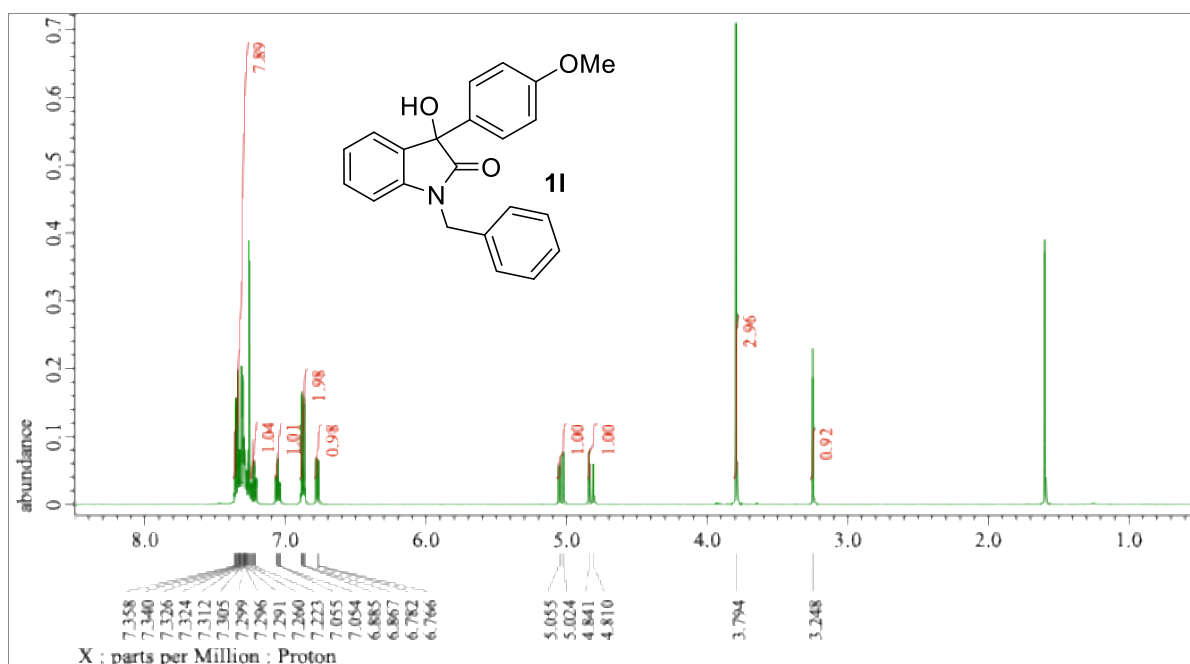

**(±)-3-Hydroxy-1-(4-methoxybenzyl)-3-(4-methoxyphenyl)oxindole ((±)-1m)**

<sup>1</sup>H NMR

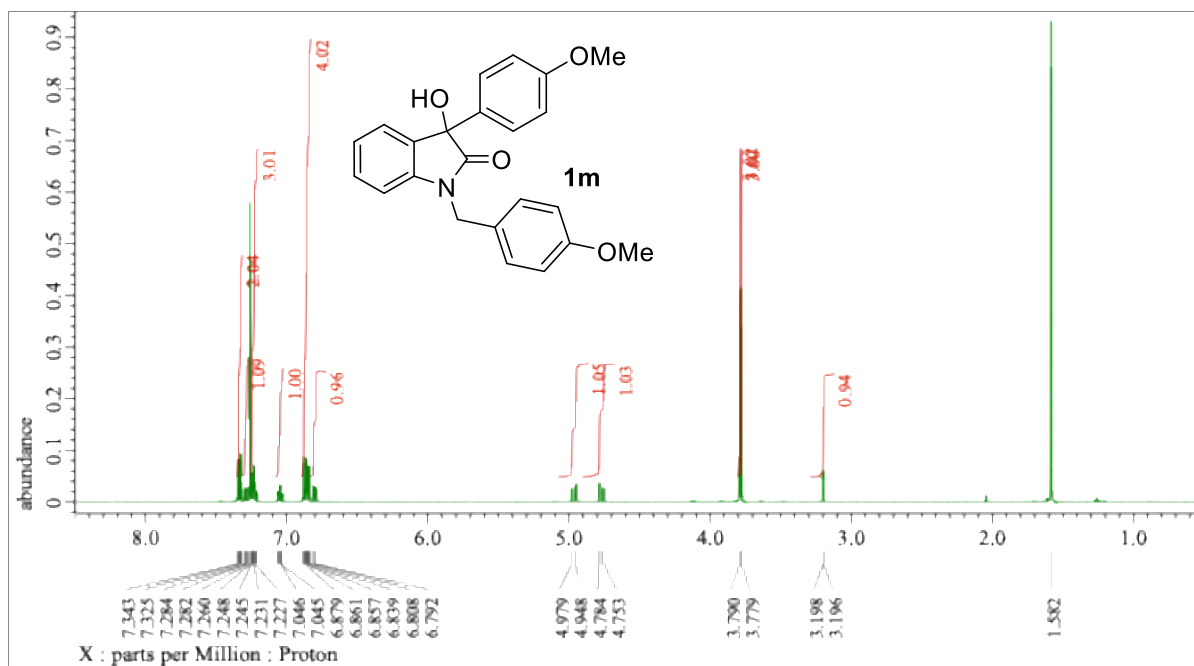

<sup>13</sup>C NMR

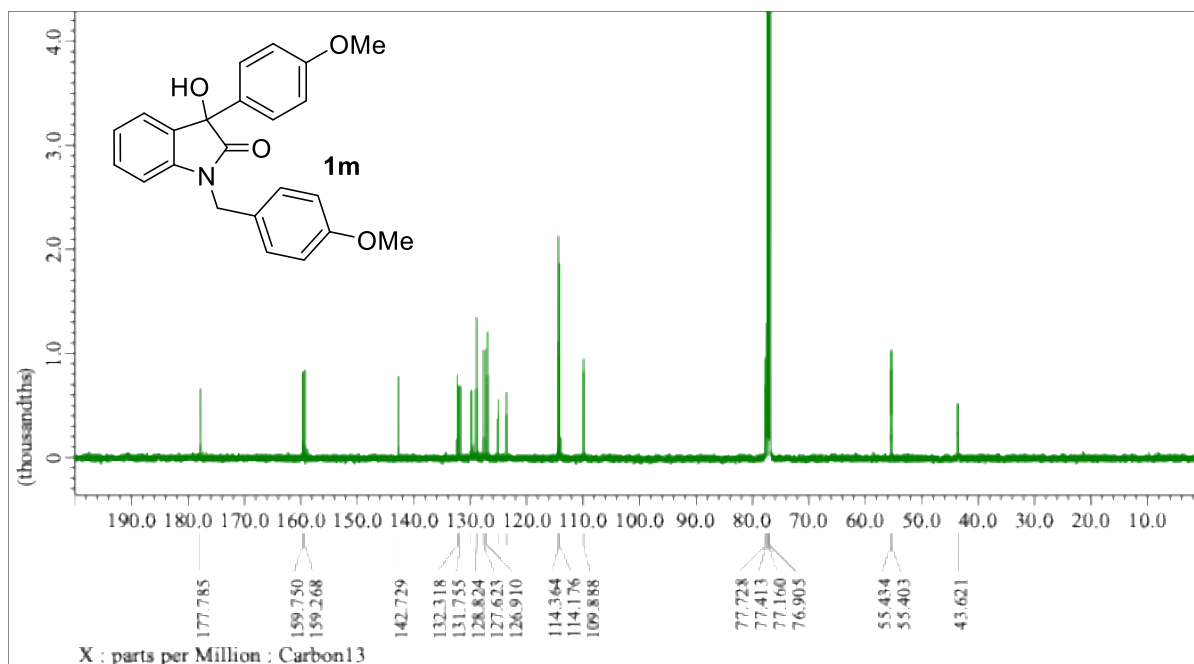

**(S)-6-Methoxy-3-(4-methoxyphenyl)-1-methyl-2-oxindolin-3-yl isobutyrate ((S)-3e)**

<sup>1</sup>H NMR

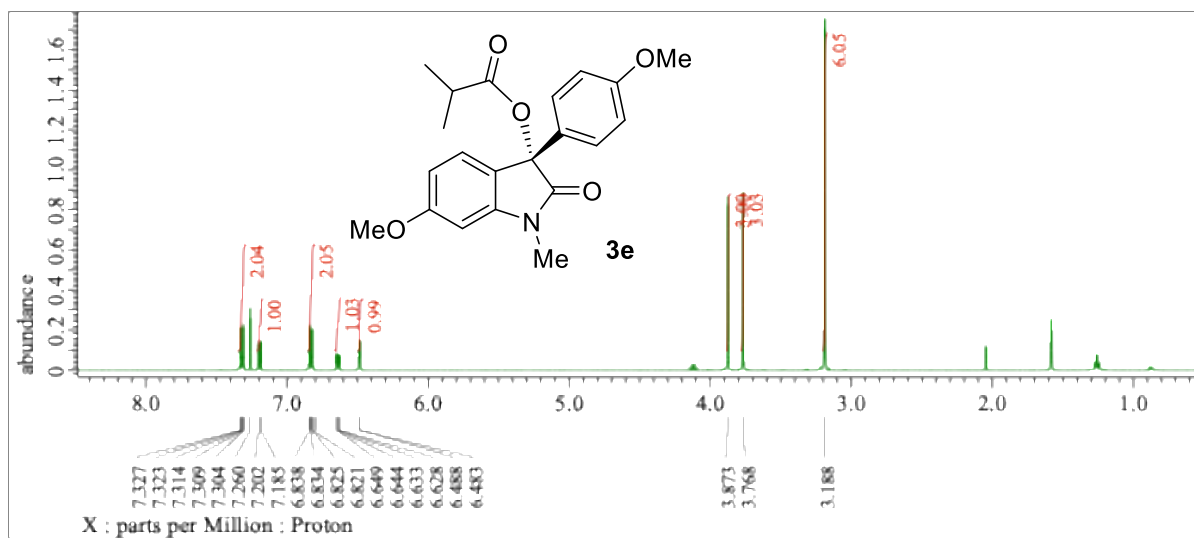

<sup>13</sup>C NMR

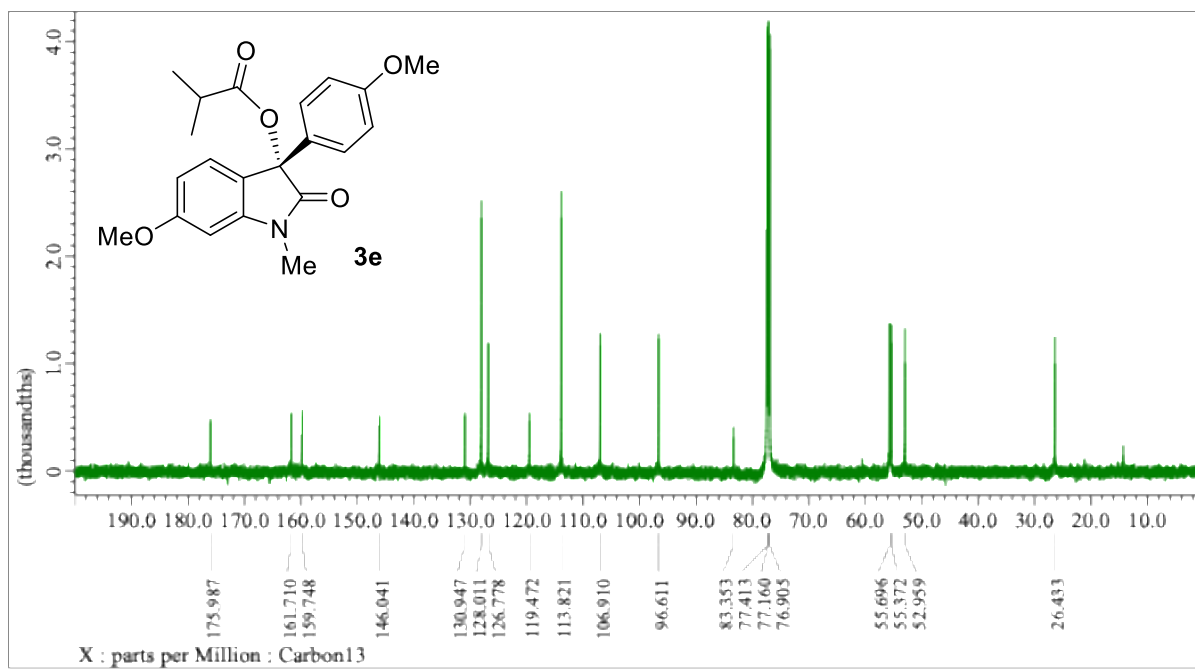

**3-Hydroxy-3-(4-methoxyphenyl)-1-methyloxindole (1a)**

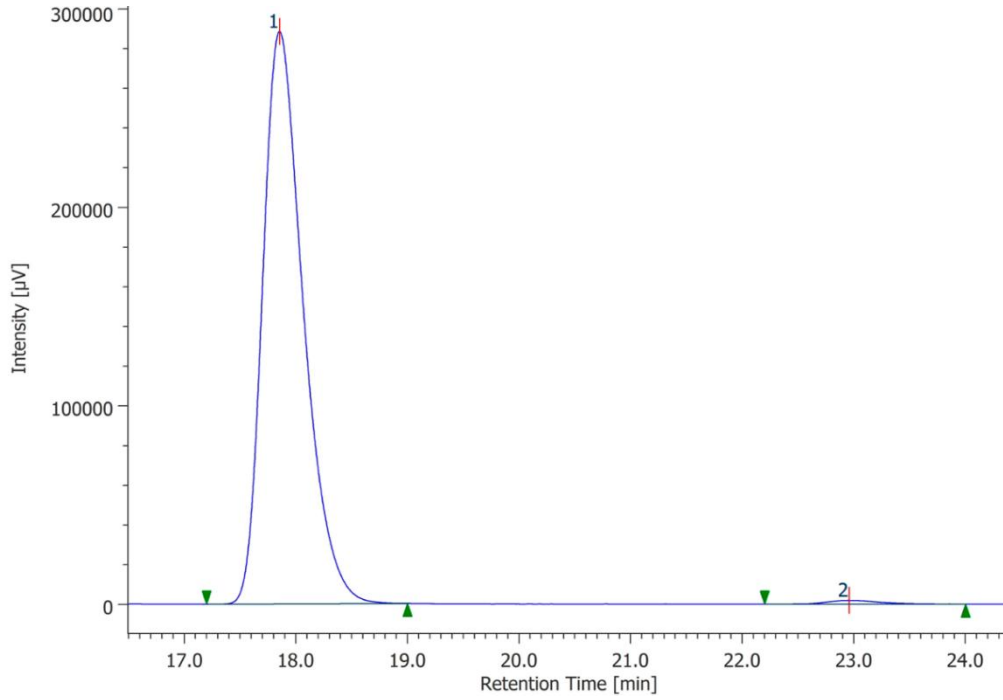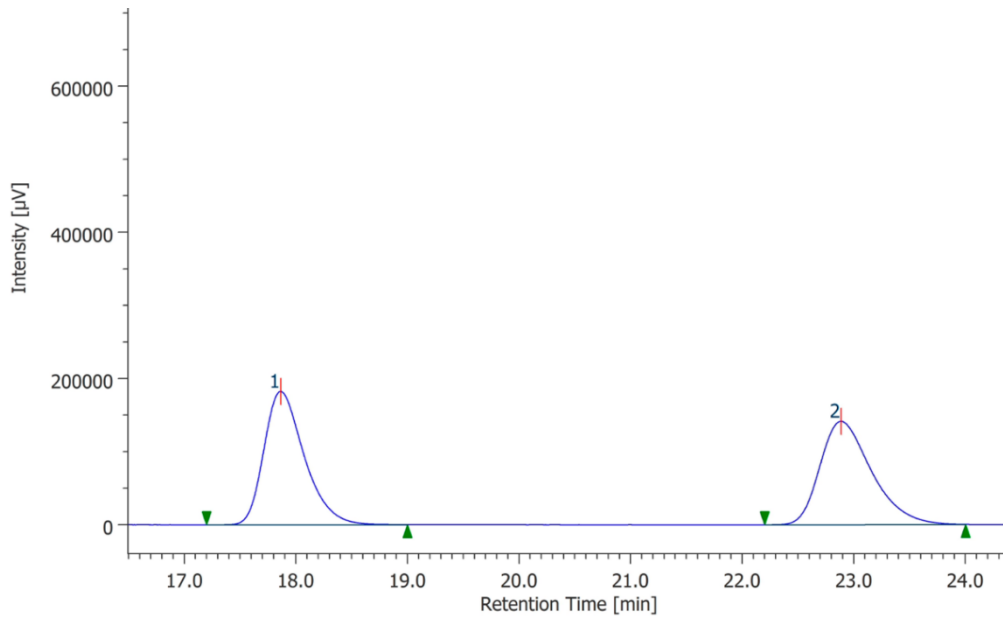

| # | Peak Name | CH | tR [min] | Area [µV.sec] | Height [µV] | Area%  | Height% | Quantity | NTP   | Resolution | Symmetry Factor | Warning |
|---|-----------|----|----------|---------------|-------------|--------|---------|----------|-------|------------|-----------------|---------|
| 1 | Unknown   | 6  | 17.853   | 7276003       | 288284      | 99.140 | 99.351  | N/A      | 11942 | 6.896      | 1.375           |         |
| 2 | Unknown   | 6  | 22.957   | 63140         | 1882        | 0.860  | 0.649   | N/A      | 12226 | N/A        | 1.255           |         |

| # | Peak Name | CH | tR [min] | Area [µV.sec] | Height [µV] | Area%  | Height% | Quantity | NTP   | Resolution | Symmetry Factor | Warning |
|---|-----------|----|----------|---------------|-------------|--------|---------|----------|-------|------------|-----------------|---------|
| 1 | Unknown   | 6  | 17.863   | 4572679       | 182389      | 50.220 | 56.355  | N/A      | 12166 | 6.804      | 1.359           |         |
| 2 | Unknown   | 6  | 22.883   | 4532541       | 141251      | 49.780 | 43.645  | N/A      | 12109 | N/A        | 1.389           |         |

**3-Hydroxy-3-(4-methoxyphenyl)-1,5-dimethoxyindole (1b)**

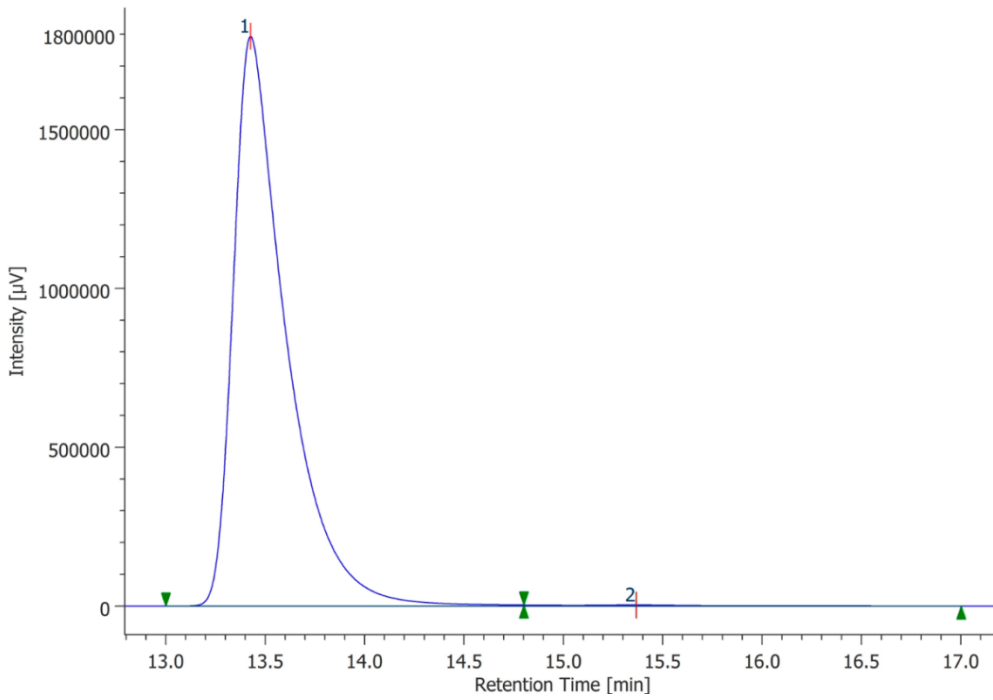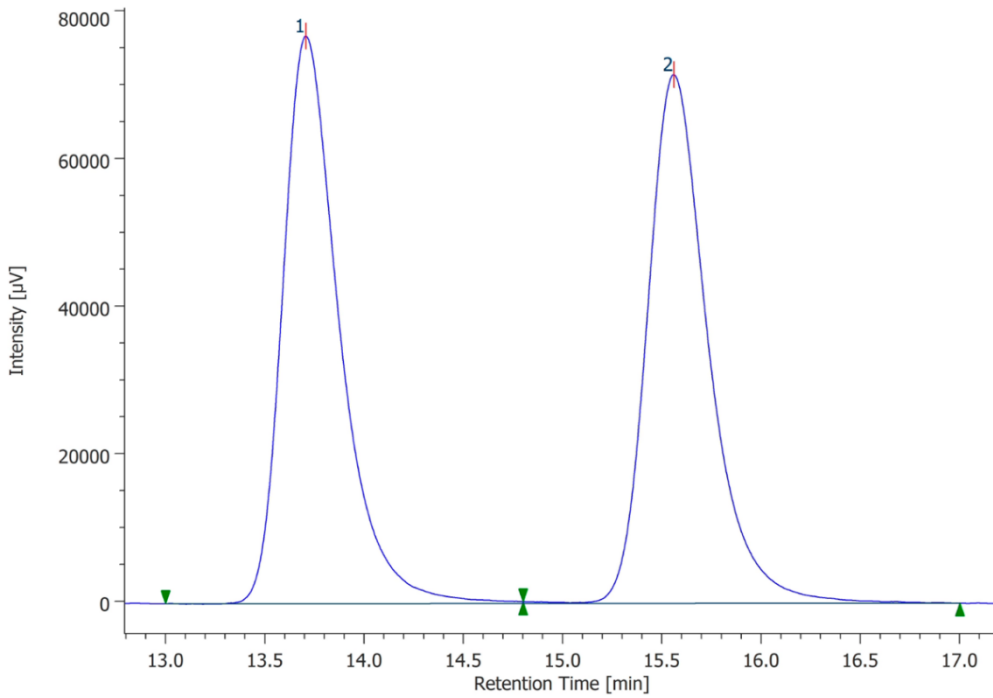

| # | Peak Name | CH | tR [min] | Area [µV·sec] | Height [µV] | Area%  | Height% | Quantity | NTP   | Resolution | Symmetry Factor | Warning |
|---|-----------|----|----------|---------------|-------------|--------|---------|----------|-------|------------|-----------------|---------|
| 1 | Unknown   | 6  | 13.427   | 33254954      | 1793932     | 99.534 | 99.824  | N/A      | 14256 | N/A        | 1.892           |         |
| 2 | Unknown   | 6  | 15.367   | 155803        | 3157        | 0.466  | 0.176   | N/A      | N/A   | N/A        | N/A             |         |

| # | Peak Name | CH | tR [min] | Area [µV·sec] | Height [µV] | Area%  | Height% | Quantity | NTP   | Resolution | Symmetry Factor | Warning |
|---|-----------|----|----------|---------------|-------------|--------|---------|----------|-------|------------|-----------------|---------|
| 1 | Unknown   | 6  | 13.707   | 1525029       | 76859       | 49.986 | 51.778  | N/A      | 12215 | 3.610      | 1.442           |         |
| 2 | Unknown   | 6  | 15.560   | 1525901       | 71580       | 50.014 | 48.222  | N/A      | 13610 | N/A        | 1.327           |         |

**5-Fluoro-3-hydroxy-3-(4-methoxyphenyl)-1-methyloxindole (1c)**

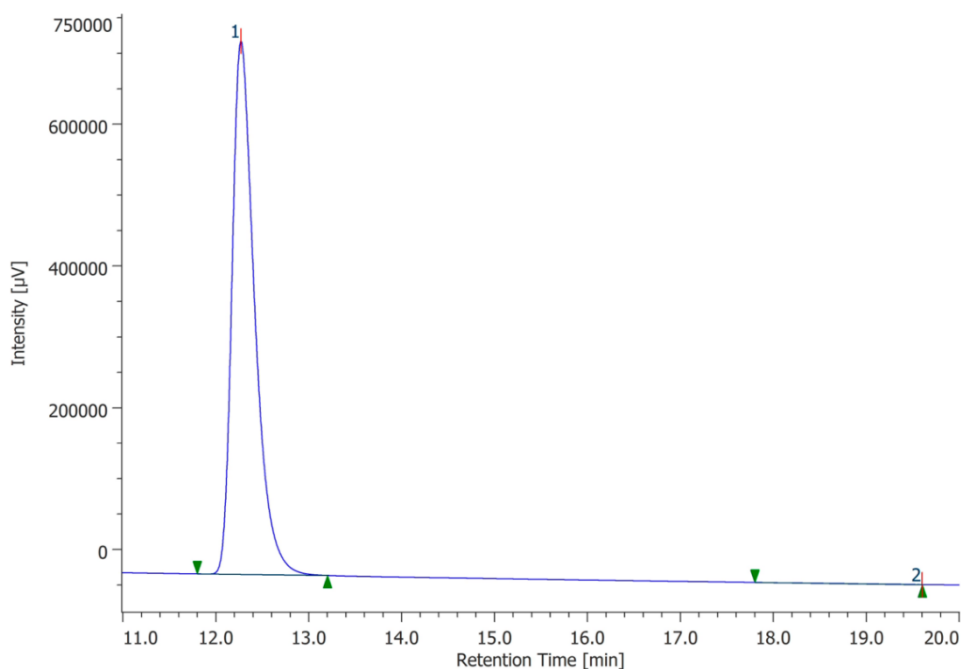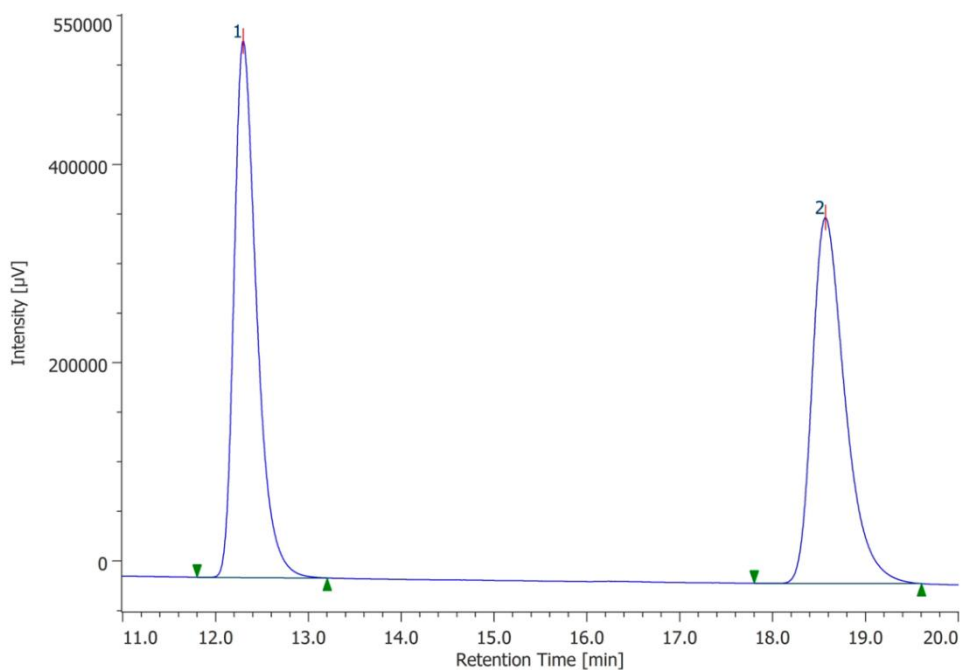

| # | Peak Name | CH | tR [min] | Area [µV·sec] | Height [µV] | Area%   | Height% | Quantity | NTP   | Resolution | Symmetry Factor | Warning |
|---|-----------|----|----------|---------------|-------------|---------|---------|----------|-------|------------|-----------------|---------|
| 1 | Unknown   | 6  | 12.270   | 12714939      | 752175      | 100.000 | 99.999  | N/A      | 13051 | N/A        | 1.488           |         |
| 2 | Unknown   | 6  | 19.597   | 4             | 9           | 0.000   | 0.001   | N/A      | N/A   | N/A        | N/A             |         |

| # | Peak Name | CH | tR [min] | Area [µV·sec] | Height [µV] | Area%  | Height% | Quantity | NTP   | Resolution | Symmetry Factor | Warning |
|---|-----------|----|----------|---------------|-------------|--------|---------|----------|-------|------------|-----------------|---------|
| 1 | Unknown   | 6  | 12.297   | 9135610       | 540749      | 50.133 | 59.449  | N/A      | 13119 | 11.891     | 1.448           |         |
| 2 | Unknown   | 6  | 18.567   | 9087142       | 368858      | 49.867 | 40.551  | N/A      | 13987 | N/A        | 1.443           |         |

**Chloro-3-hydroxy-3-(4-methoxyphenyl)-1-methoxyindole (1d)**

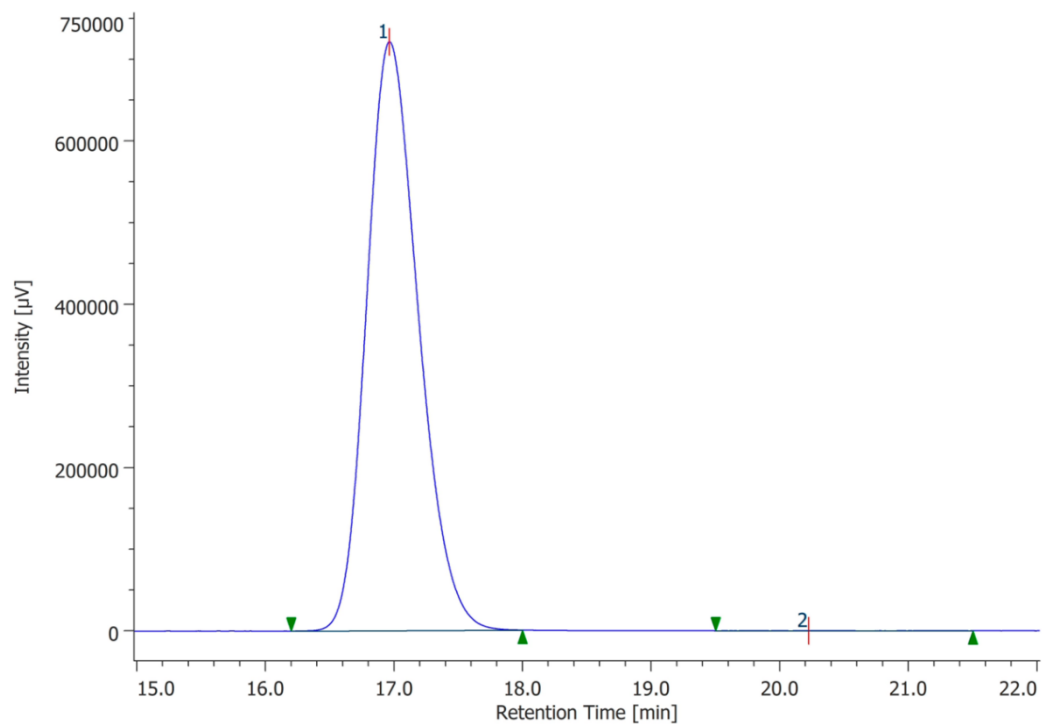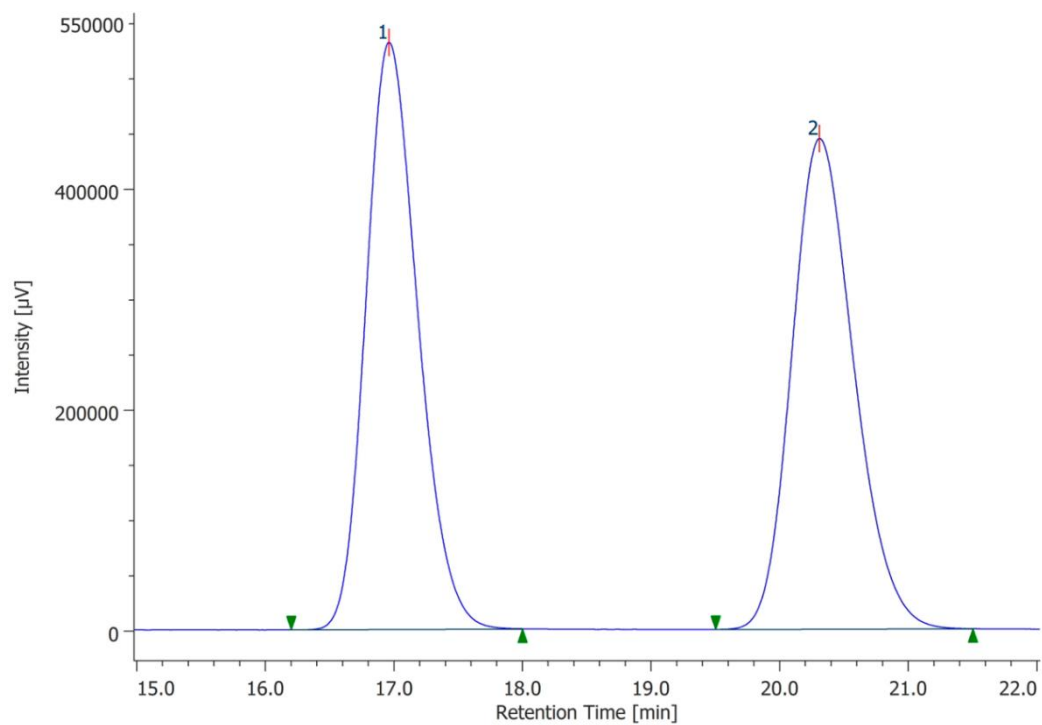

| # | Peak Name | CH | tR [min] | Area [µV·sec] | Height [µV] | Area%  | Height% | Quantity | NTP  | Resolution | Symmetry Factor | Warning |
|---|-----------|----|----------|---------------|-------------|--------|---------|----------|------|------------|-----------------|---------|
| 1 | Unknown   | 6  | 16.963   | 20205289      | 720868      | 99.980 | 99.980  | N/A      | 8499 | 3.070      | 1.223           |         |
| 2 | Unknown   | 6  | 20.223   | 4025          | 143         | 0.020  | 0.020   | N/A      | 3369 | N/A        | 1.437           |         |

| # | Peak Name | CH | tR [min] | Area [µV·sec] | Height [µV] | Area%  | Height% | Quantity | NTP  | Resolution | Symmetry Factor | Warning |
|---|-----------|----|----------|---------------|-------------|--------|---------|----------|------|------------|-----------------|---------|
| 1 | Unknown   | 6  | 16.960   | 14929586      | 531400      | 49.999 | 54.470  | N/A      | 8445 | 4.139      | 1.211           |         |
| 2 | Unknown   | 6  | 20.307   | 14930024      | 444185      | 50.001 | 45.530  | N/A      | 8461 | N/A        | 1.206           |         |

**3-Hydroxy-6-methoxy-3-(4-methoxyphenyl)-1-methyloxindole (1e)**

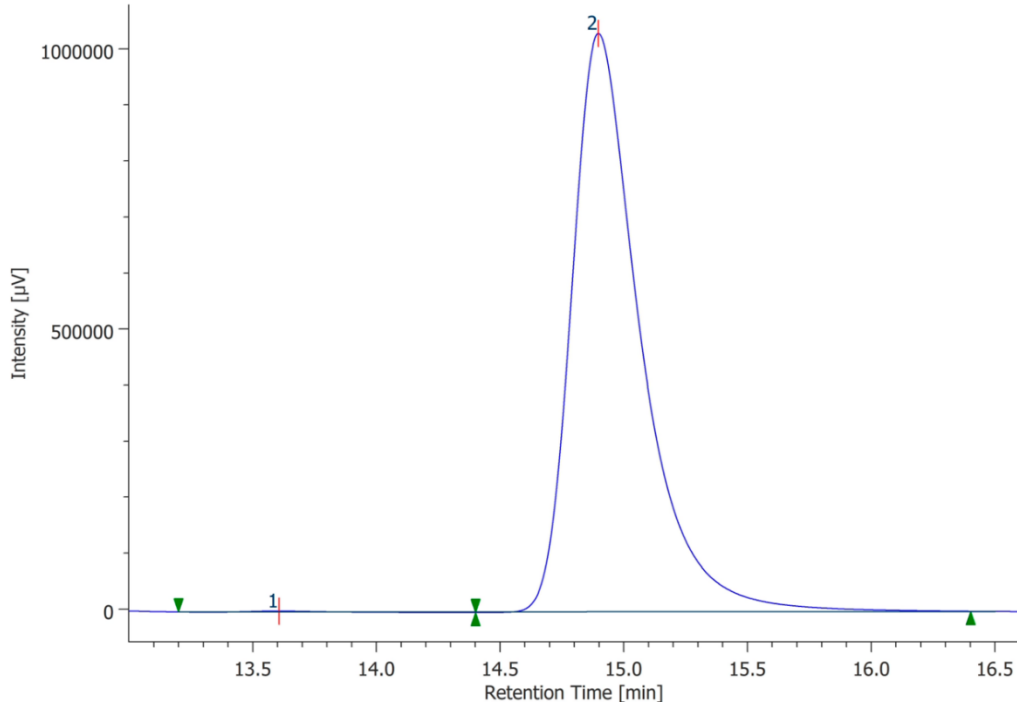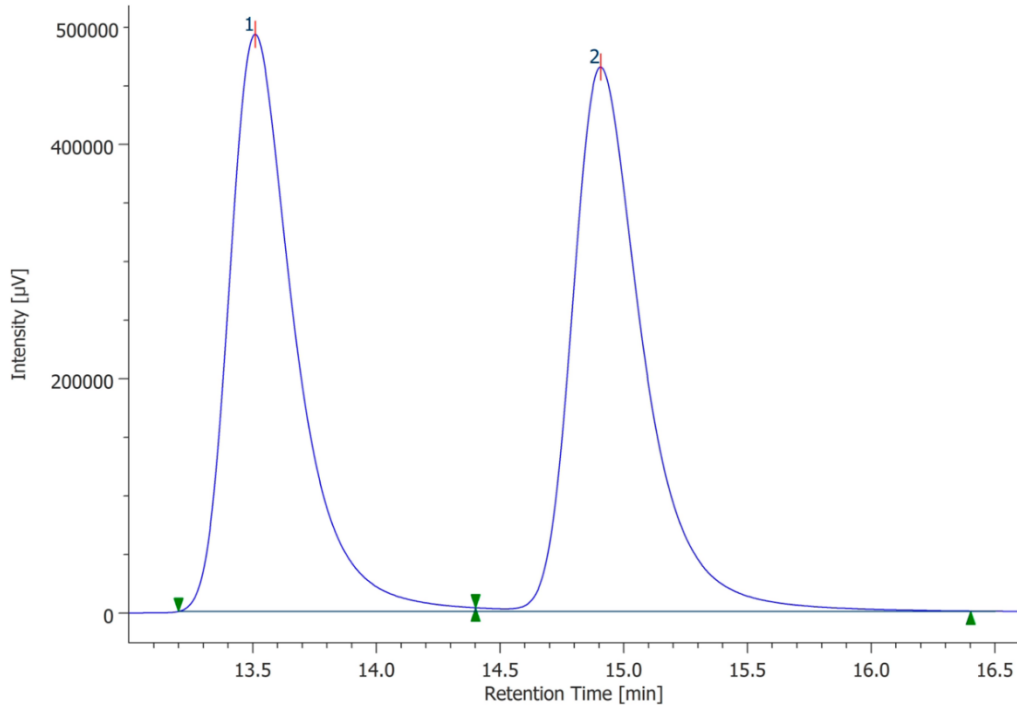

| # | Peak Name | CH | tR [min] | Area [µV·sec] | Height [µV] | Area%  | Height% | Quantity | NTP   | Resolution | Symmetry Factor | Warning |
|---|-----------|----|----------|---------------|-------------|--------|---------|----------|-------|------------|-----------------|---------|
| 1 | Unknown   | 6  | 13.607   | 19866         | 1465        | 0.100  | 0.142   | N/A      | 19646 | 2.994      | 1.077           |         |
| 2 | Unknown   | 6  | 14.897   | 19943215      | 1031670     | 99.900 | 99.858  | N/A      | 15691 | N/A        | 1.552           |         |

| # | Peak Name | CH | tR [min] | Area [µV·sec] | Height [µV] | Area%  | Height% | Quantity | NTP   | Resolution | Symmetry Factor | Warning |
|---|-----------|----|----------|---------------|-------------|--------|---------|----------|-------|------------|-----------------|---------|
| 1 | Unknown   | 6  | 13.510   | 9186840       | 492470      | 49.528 | 51.464  | N/A      | 13750 | 2.931      | 1.547           |         |
| 2 | Unknown   | 6  | 14.907   | 9361966       | 464457      | 50.472 | 48.536  | N/A      | 14523 | N/A        | 1.497           |         |

### 3-Hydroxy-6-methoxy-1-methyl-3-phenyloxindole (1f)

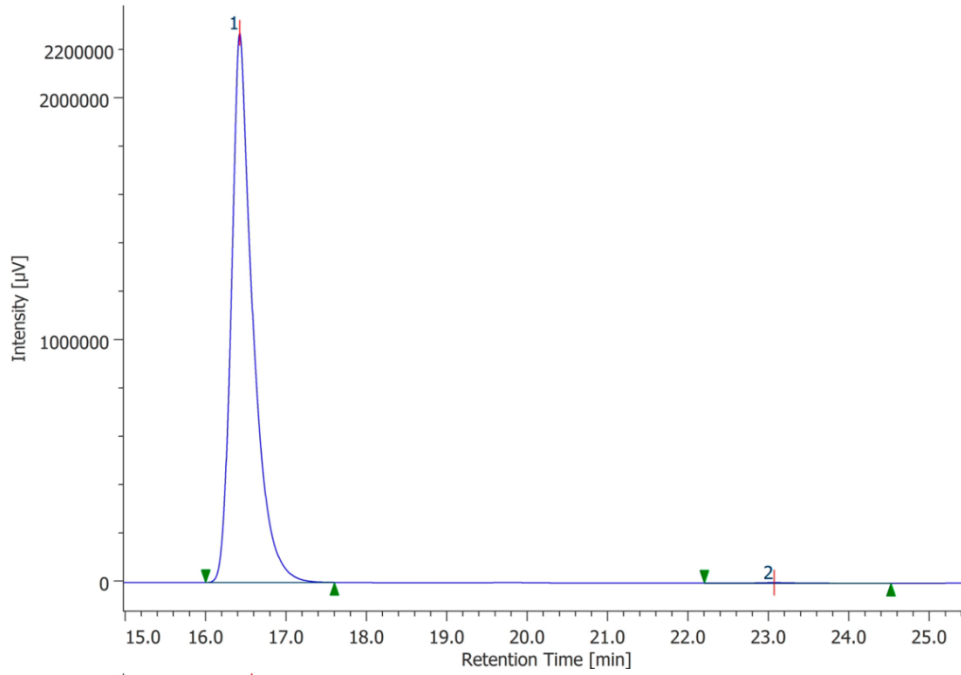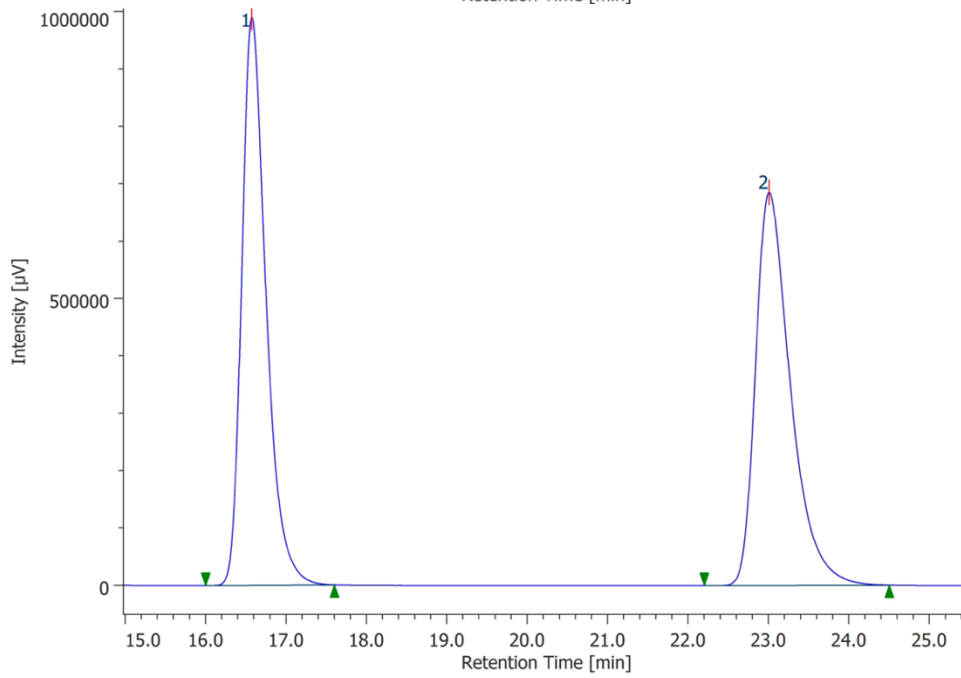

| # | Peak Name | CH | tR [min] | Area [µV·sec] | Height [µV] | Area%  | Height% | Quantity | NTP   | Resolution | Symmetry Factor | Warning |
|---|-----------|----|----------|---------------|-------------|--------|---------|----------|-------|------------|-----------------|---------|
| 1 | Unknown   | 6  | 16.423   | 42063154      | 2273757     | 99.836 | 99.899  | N/A      | 21205 | 11.120     | 1.494           |         |
| 2 | Unknown   | 6  | 23.070   | 69227         | 2303        | 0.164  | 0.101   | N/A      | 15240 | N/A        | 1.728           |         |

| # | Peak Name | CH | tR [min] | Area [µV·sec] | Height [µV] | Area%  | Height% | Quantity | NTP   | Resolution | Symmetry Factor | Warning |
|---|-----------|----|----------|---------------|-------------|--------|---------|----------|-------|------------|-----------------|---------|
| 1 | Unknown   | 6  | 16.573   | 20766980      | 989290      | 50.078 | 59.085  | N/A      | 15432 | 9.928      | 1.387           |         |
| 2 | Unknown   | 6  | 23.007   | 20702203      | 685049      | 49.922 | 40.915  | N/A      | 14442 | N/A        | 1.518           |         |

### 3-Hydroxy-1-methyl-3-phenyloxindole (1g)

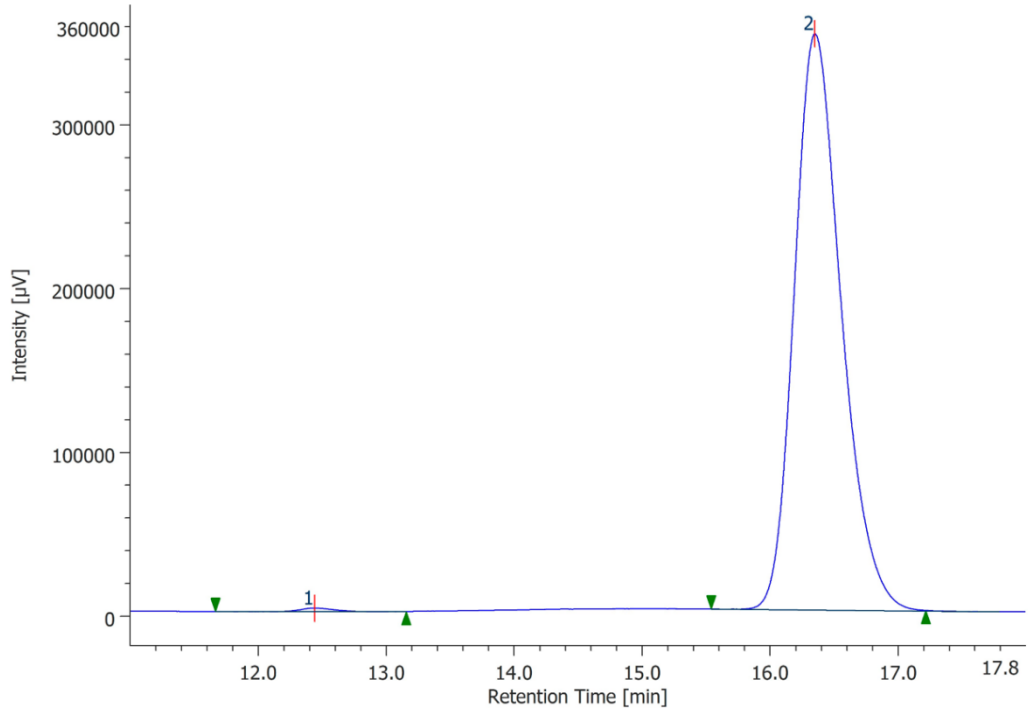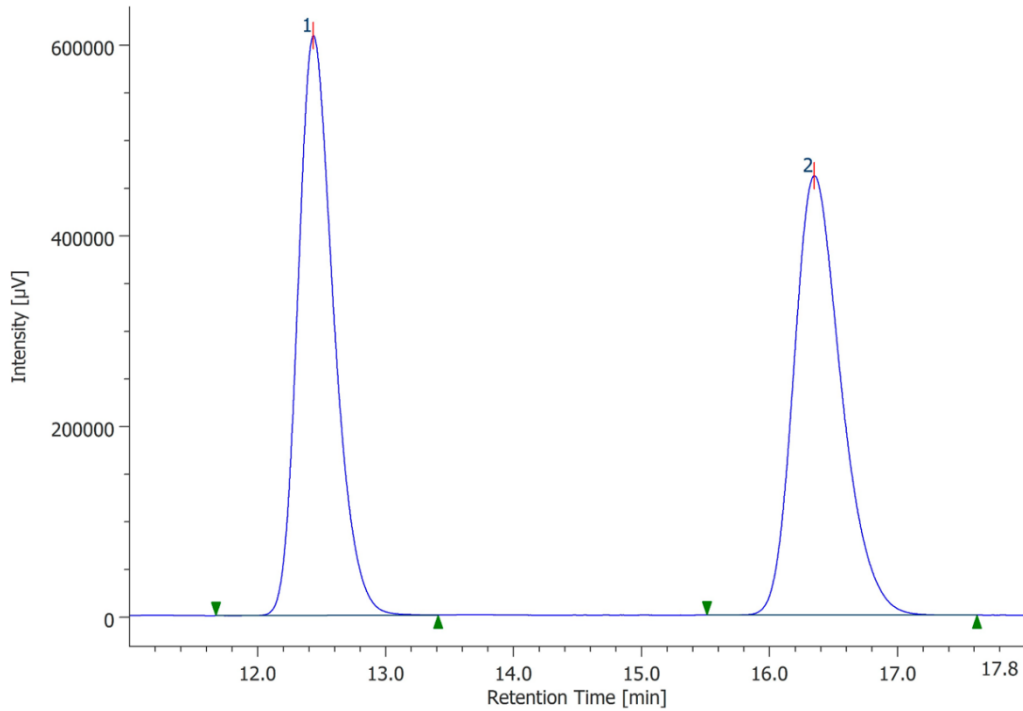

| # | Peak Name | CH | tR [min] | Area [µV·sec] | Height [µV] | Area%  | Height% | Quantity | NTP   | Resolution | Symmetry Factor | Warning |
|---|-----------|----|----------|---------------|-------------|--------|---------|----------|-------|------------|-----------------|---------|
| 1 | Unknown   | 6  | 12.440   | 36702         | 2118        | 0.407  | 0.599   | N/A      | 11614 | 6.969      | 1.158           |         |
| 2 | Unknown   | 6  | 16.347   | 8980377       | 351706      | 99.593 | 99.401  | N/A      | 9743  | N/A        | 1.258           |         |

| # | Peak Name | CH | tR [min] | Area [µV·sec] | Height [µV] | Area%  | Height% | Quantity | NTP  | Resolution | Symmetry Factor | Warning |
|---|-----------|----|----------|---------------|-------------|--------|---------|----------|------|------------|-----------------|---------|
| 1 | Unknown   | 6  | 12.433   | 11815186      | 608252      | 49.894 | 56.891  | N/A      | 9756 | 6.695      | 1.272           |         |
| 2 | Unknown   | 6  | 16.347   | 11865520      | 460895      | 50.106 | 43.109  | N/A      | 9562 | N/A        | 1.275           |         |

### 3-(Benzo[d][1,3]dioxo-5-yl)-3-hydroxy-1-methoxyindole (1h)

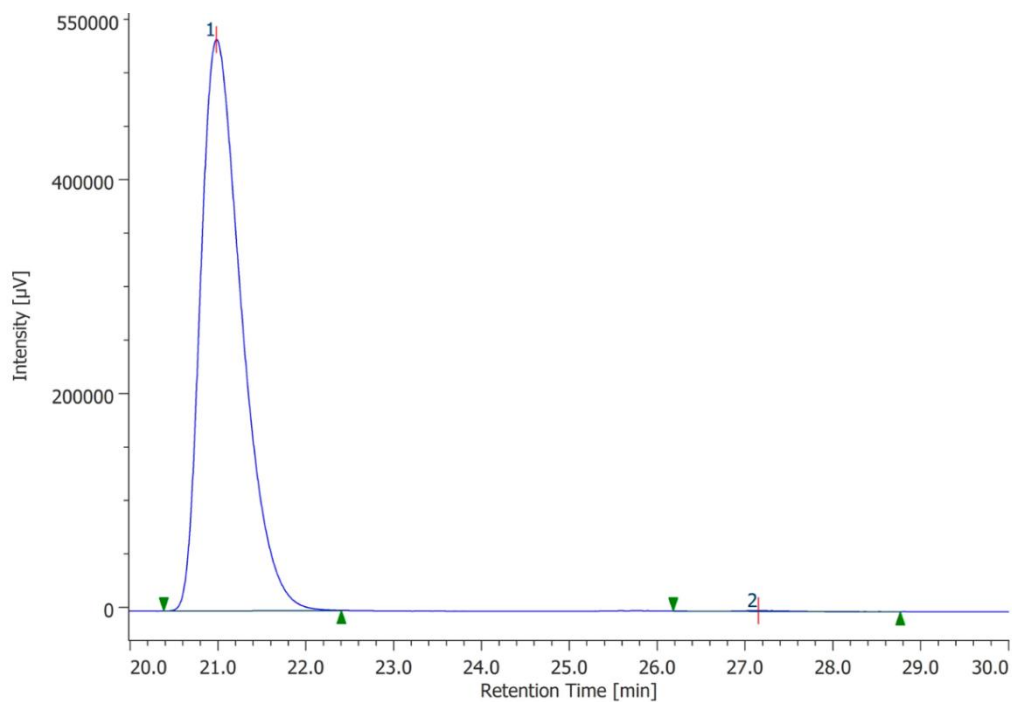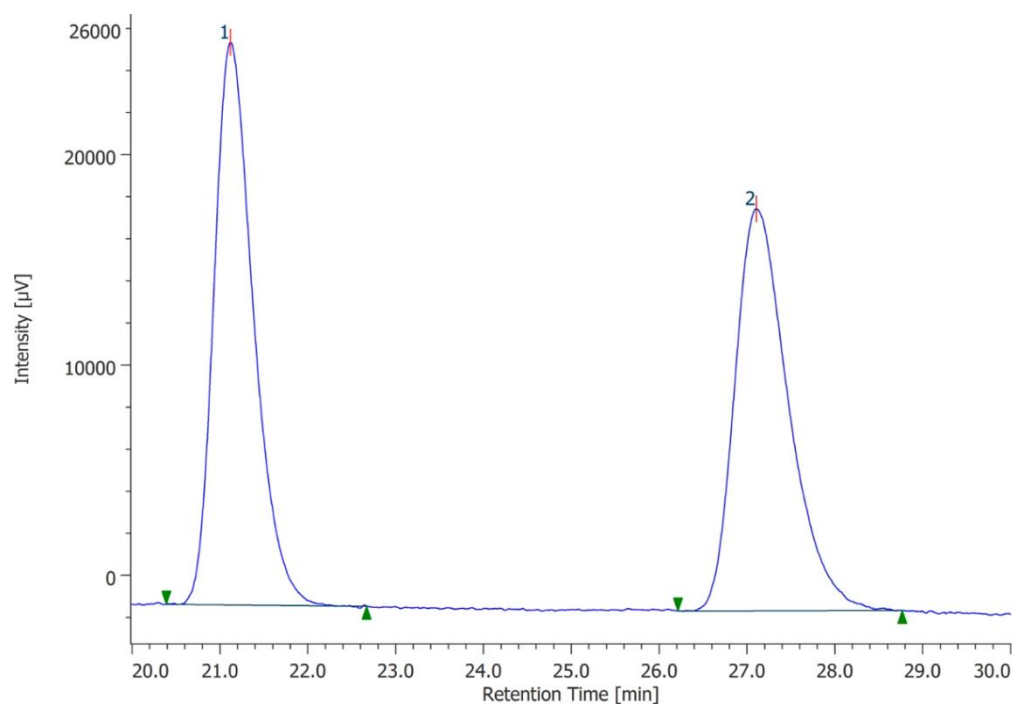

| # | Peak Name | CH | tR [min] | Area [µV.sec] | Height [µV] | Area%  | Height% | Quantity | NTP   | Resolution | Symmetry Factor | Warning |
|---|-----------|----|----------|---------------|-------------|--------|---------|----------|-------|------------|-----------------|---------|
| 1 | Unknown   | 6  | 20.983   | 17285027      | 534095      | 99.911 | 99.912  | N/A      | 9854  | 6.926      | 1.511           |         |
| 2 | Unknown   | 6  | 27.150   | 15463         | 471         | 0.089  | 0.088   | N/A      | 13347 | N/A        | 1.321           |         |

| # | Peak Name | CH | tR [min] | Area [µV.sec] | Height [µV] | Area%  | Height% | Quantity | NTP   | Resolution | Symmetry Factor | Warning |
|---|-----------|----|----------|---------------|-------------|--------|---------|----------|-------|------------|-----------------|---------|
| 1 | Unknown   | 6  | 21.120   | 832793        | 26735       | 50.702 | 58.320  | N/A      | 10913 | 6.297      | 1.329           |         |
| 2 | Unknown   | 6  | 27.103   | 809736        | 19107       | 49.298 | 41.680  | N/A      | 9772  | N/A        | 1.409           |         |

**3-Hydroxy-1-methyl-3-(thiophen-2-yl)oxindole (1i)**

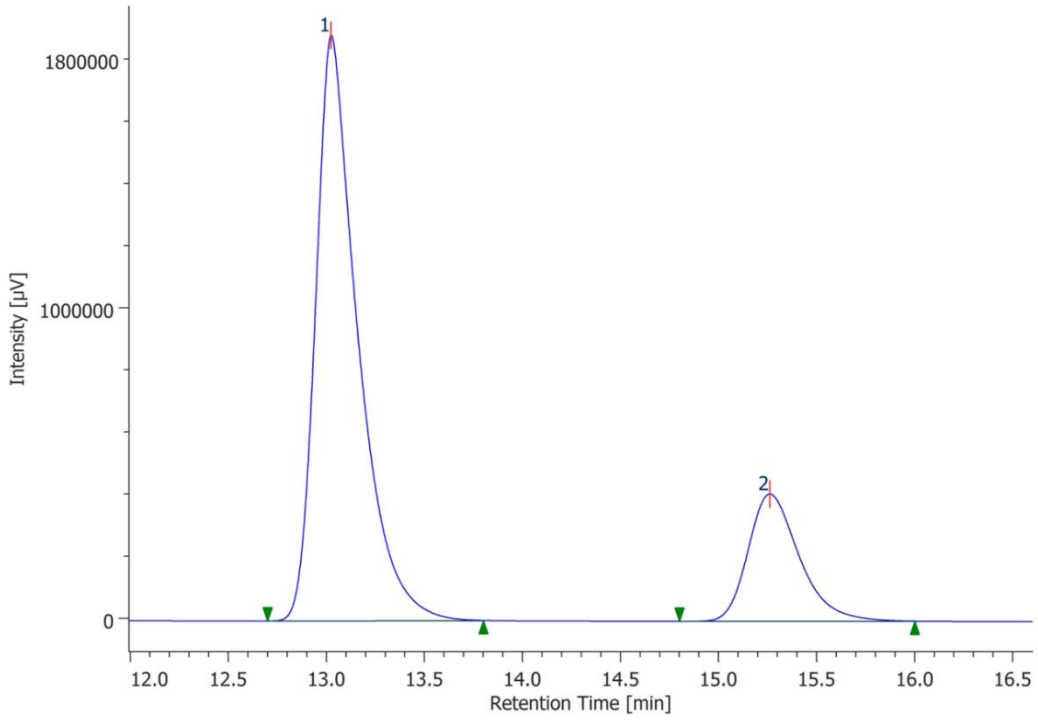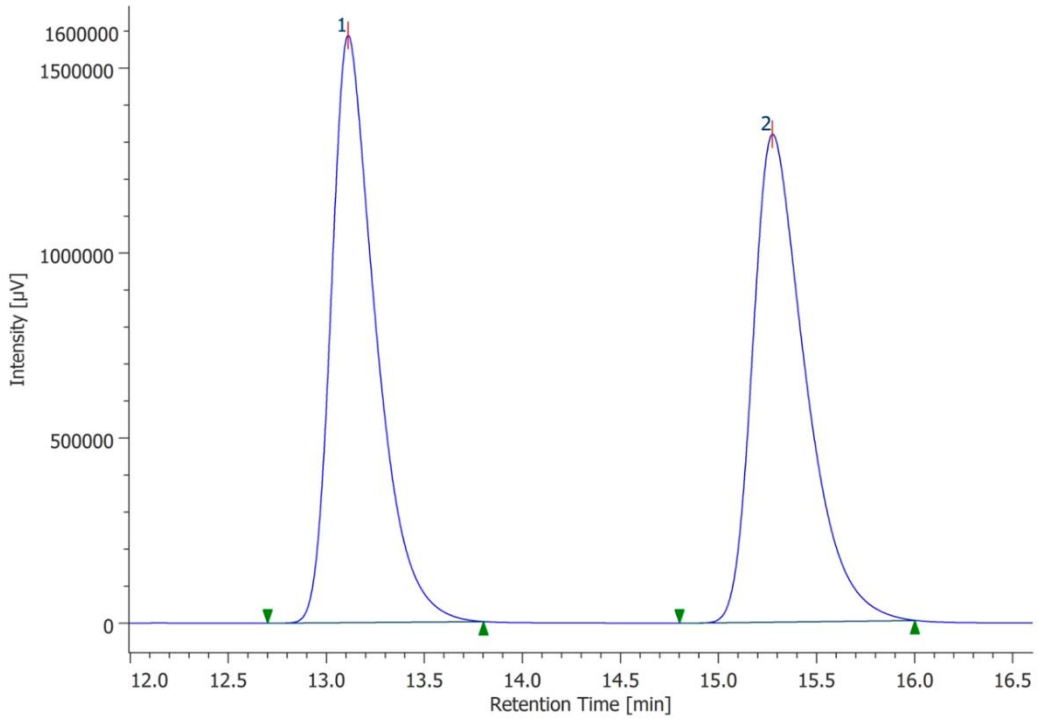

| # | Peak Name | CH | tR [min] | Area [µV·sec] | Height [µV] | Area%  | Height% | Quantity | NTP   | Resolution | Symmetry Factor | Warning |
|---|-----------|----|----------|---------------|-------------|--------|---------|----------|-------|------------|-----------------|---------|
| 1 | Unknown   | 6  | 13.023   | 28129244      | 1884659     | 79.043 | 82.144  | N/A      | 19835 | 5.375      | 1.580           |         |
| 2 | Unknown   | 6  | 15.260   | 7457825       | 409668      | 20.957 | 17.856  | N/A      | 17258 | N/A        | 1.341           |         |

| # | Peak Name | CH | tR [min] | Area [µV·sec] | Height [µV] | Area%  | Height% | Quantity | NTP   | Resolution | Symmetry Factor | Warning |
|---|-----------|----|----------|---------------|-------------|--------|---------|----------|-------|------------|-----------------|---------|
| 1 | Unknown   | 6  | 13.110   | 25135577      | 1586350     | 50.412 | 54.611  | N/A      | 17124 | 4.936      | 1.528           |         |
| 2 | Unknown   | 6  | 15.273   | 24724982      | 1318470     | 49.588 | 45.389  | N/A      | 16331 | N/A        | 1.545           |         |

### 1-Allyl-3-hydroxy-3-(4-methoxyphenyl)oxindole (1k)

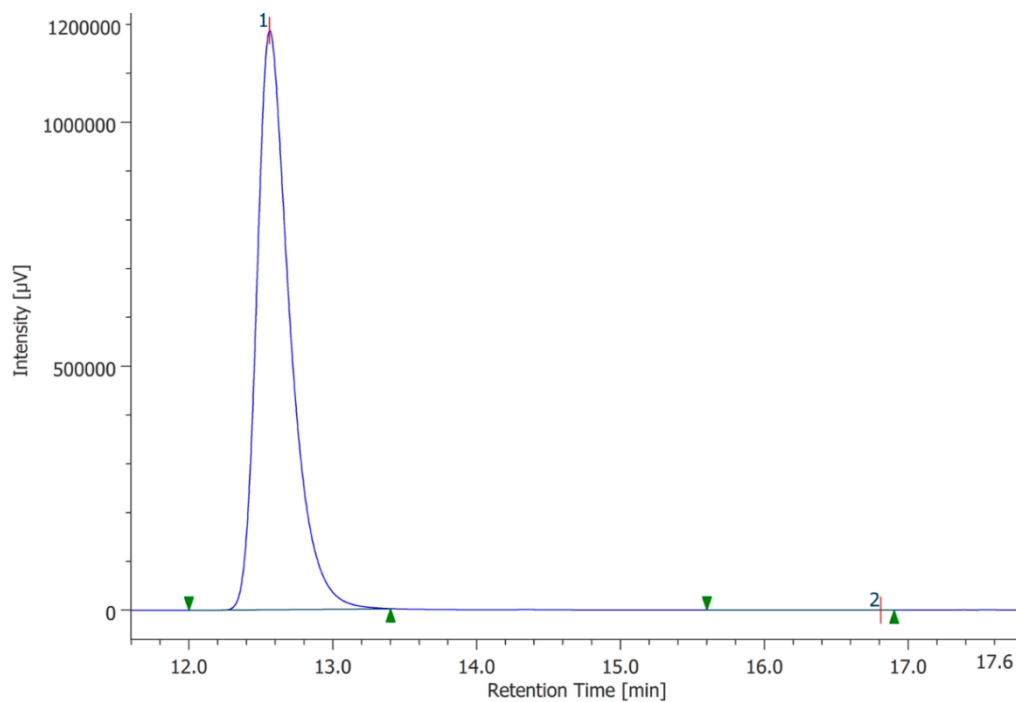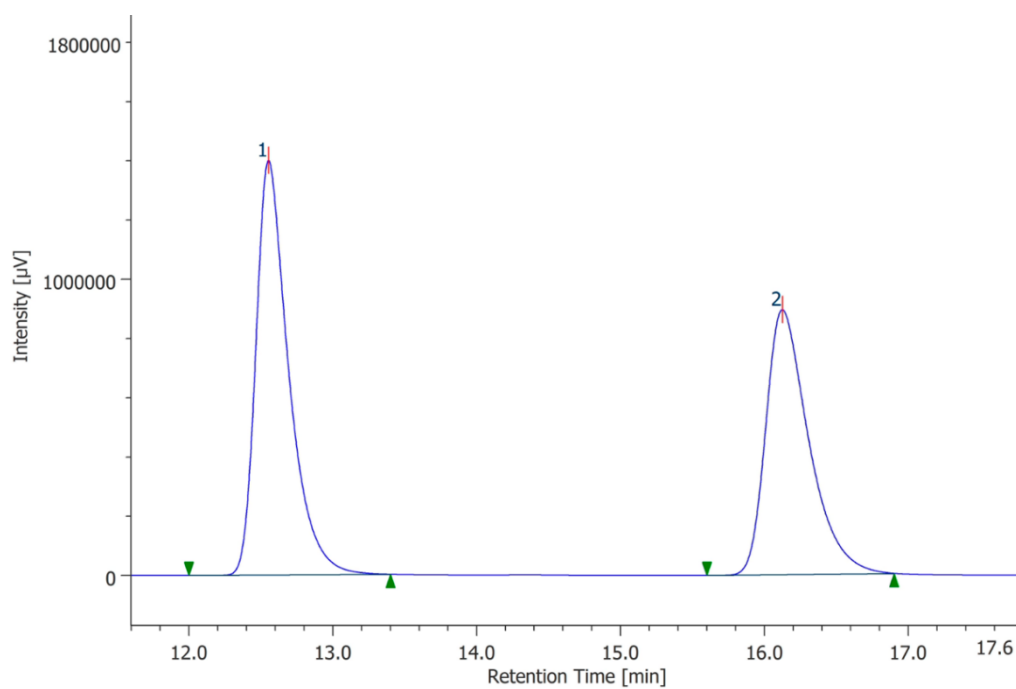

| # | Peak Name | CH | tR [min] | Area [µV·sec] | Height [µV] | Area%   | Height% | Quantity | NTP   | Resolution | Symmetry Factor | Warning |
|---|-----------|----|----------|---------------|-------------|---------|---------|----------|-------|------------|-----------------|---------|
| 1 | Unknown   | 6  | 12.560   | 19004811      | 1186543     | 100.000 | 99.998  | N/A      | 15588 | 4.119      | 1.503           |         |
| 2 | Unknown   | 6  | 16.807   | 67            | 26          | 0.000   | 0.002   | N/A      | 1630  | N/A        | 0.537           |         |

| # | Peak Name | CH | tR [min] | Area [µV·sec] | Height [µV] | Area%  | Height% | Quantity | NTP   | Resolution | Symmetry Factor | Warning |
|---|-----------|----|----------|---------------|-------------|--------|---------|----------|-------|------------|-----------------|---------|
| 1 | Unknown   | 6  | 12.553   | 22140801      | 1399706     | 54.428 | 61.011  | N/A      | 16138 | 7.752      | 1.517           |         |
| 2 | Unknown   | 6  | 16.123   | 18538094      | 894470      | 45.572 | 38.989  | N/A      | 14908 | N/A        | 1.502           |         |

### 1-Benzyl-3-hydroxy-3-(4-methoxyphenyl)oxindole (11)

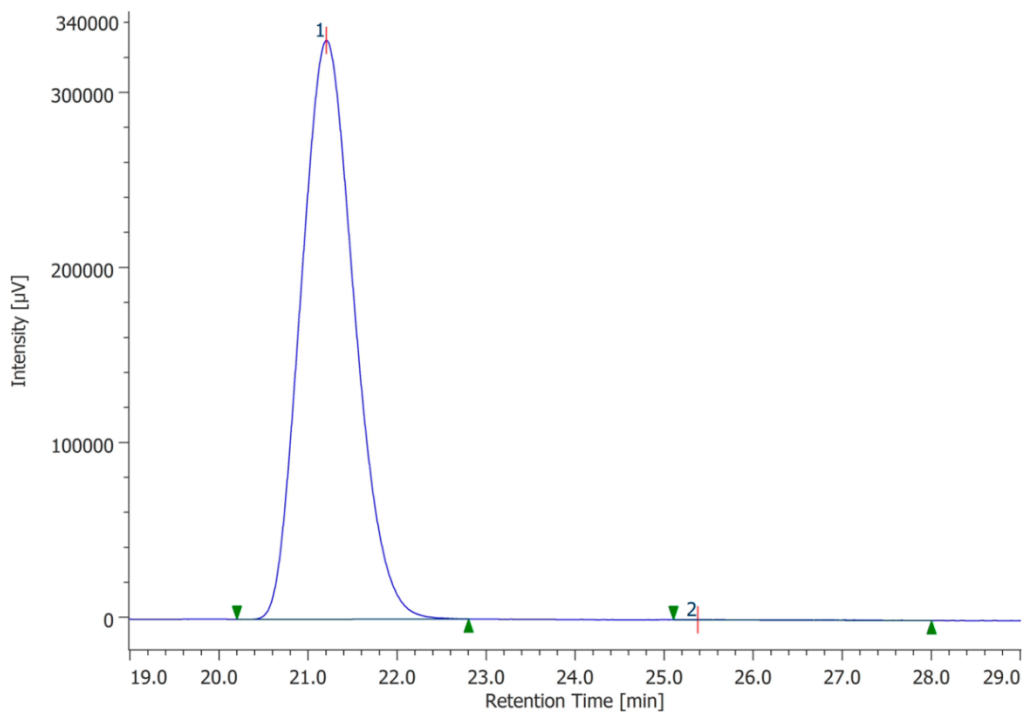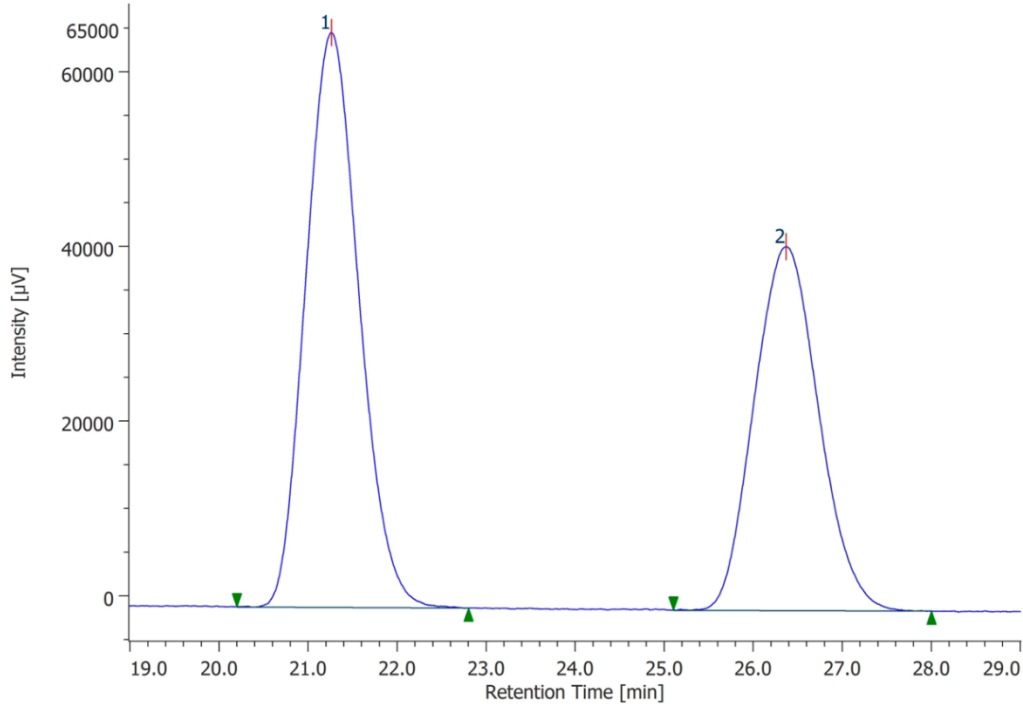

| # | Peak Name | CH | tR [min] | Area [µV·sec] | Height [µV] | Area%  | Height% | Quantity | NTP  | Resolution | Symmetry Factor | Warning |
|---|-----------|----|----------|---------------|-------------|--------|---------|----------|------|------------|-----------------|---------|
| 1 | Unknown   | 6  | 21.203   | 13759179      | 330708      | 99.935 | 99.975  | N/A      | 5840 | 1.466      | 1.159           |         |
| 2 | Unknown   | 6  | 25.373   | 8901          | 82          | 0.065  | 0.025   | N/A      | 488  | N/A        | 5.340           |         |

| # | Peak Name | CH | tR [min] | Area [µV·sec] | Height [µV] | Area%  | Height% | Quantity | NTP  | Resolution | Symmetry Factor | Warning |
|---|-----------|----|----------|---------------|-------------|--------|---------|----------|------|------------|-----------------|---------|
| 1 | Unknown   | 6  | 21.263   | 2729438       | 65765       | 56.515 | 61.225  | N/A      | 5908 | 4.158      | 1.133           |         |
| 2 | Unknown   | 6  | 26.367   | 2100126       | 41651       | 43.485 | 38.775  | N/A      | 6062 | N/A        | 1.102           |         |

**3-Hydroxy-1-(4-methoxybenzyl)-3-(4-methoxyphenyl)oxindole (1m)**

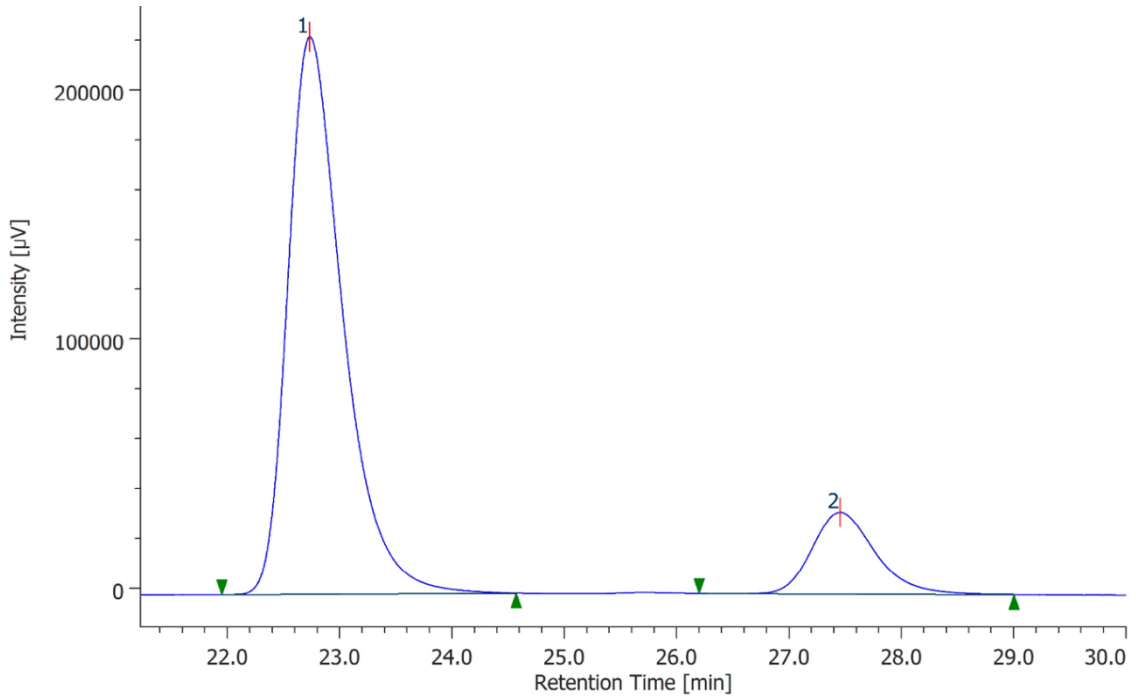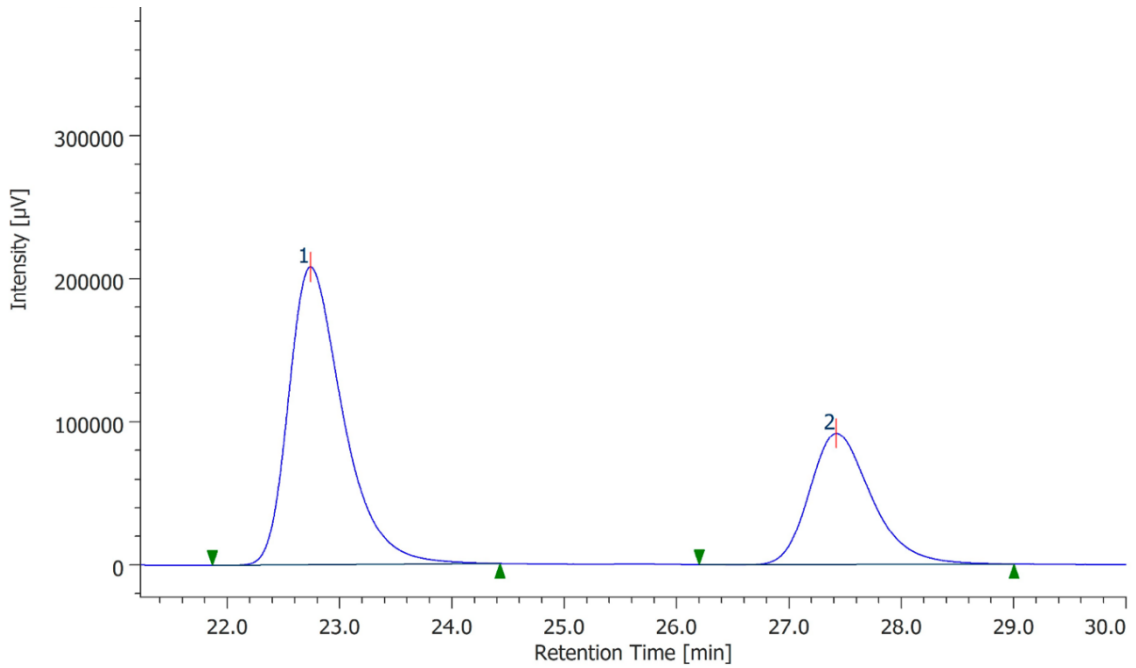

| # | Peak Name | CH | tR [min] | Area [µV-sec] | Height [µV] | Area%  | Height% | Quantity | NTP   | Resolution | Symmetry Factor | Warning |
|---|-----------|----|----------|---------------|-------------|--------|---------|----------|-------|------------|-----------------|---------|
| 1 | Unknown   | 6  | 22.733   | 7603603       | 223583      | 85.590 | 87.226  | N/A      | 11120 | 5.081      | 1.467           |         |
| 2 | Unknown   | 6  | 27.453   | 1280163       | 32742       | 14.410 | 12.774  | N/A      | 12042 | N/A        | 1.255           |         |

| # | Peak Name | CH | tR [min] | Area [µV-sec] | Height [µV] | Area%  | Height% | Quantity | NTP   | Resolution | Symmetry Factor | Warning |
|---|-----------|----|----------|---------------|-------------|--------|---------|----------|-------|------------|-----------------|---------|
| 1 | Unknown   | 6  | 22.740   | 7007307       | 207920      | 66.577 | 69.442  | N/A      | 11302 | 5.094      | 1.451           |         |
| 2 | Unknown   | 6  | 27.420   | 3517757       | 91494       | 33.423 | 30.558  | N/A      | 12353 | N/A        | 1.298           |         |

**6-Methoxy-3-(4-methoxyphenyl)-1-methyl-2-oxoindolin-3-yl isobutyrate (3e)**

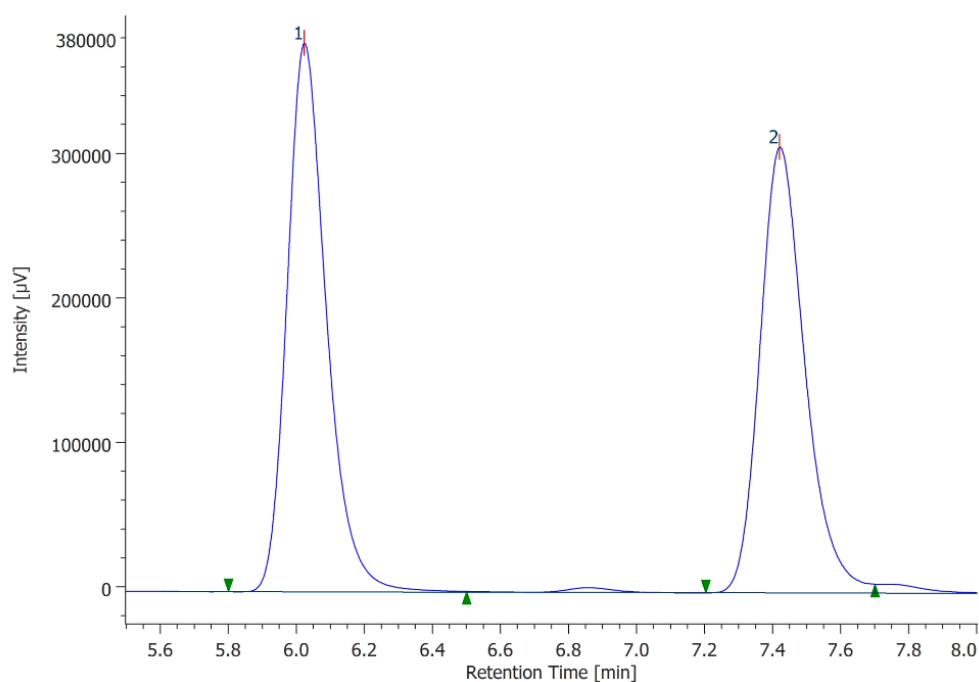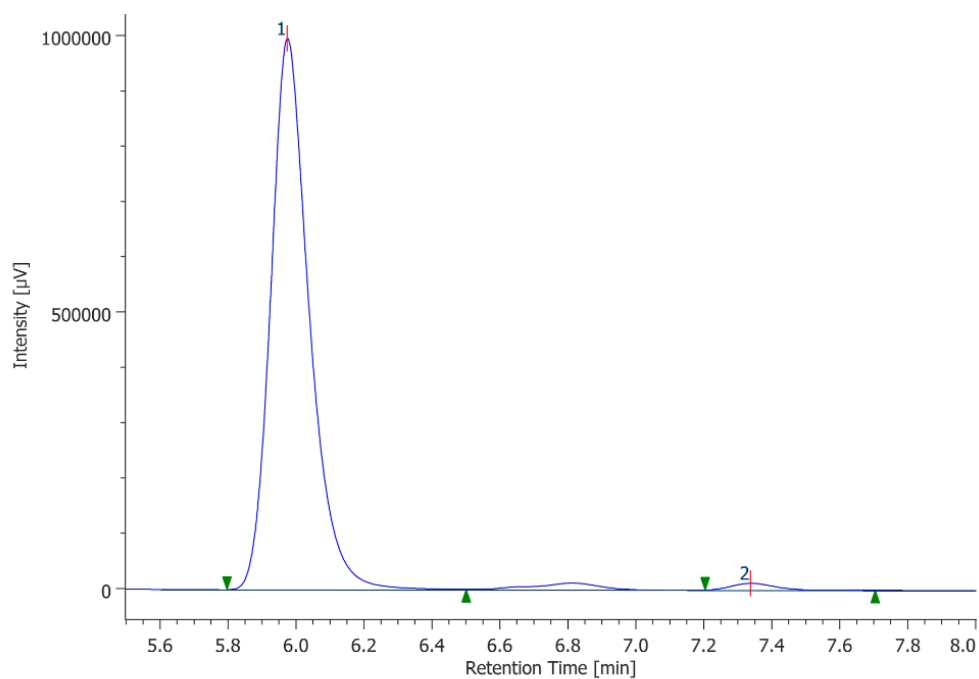

| # | Peak Name | CH | tR [min] | Area [µV·sec] | Height [µV] | Area%  | Height% | Quantity | NTP   | Resolution | Symmetry Factor | Warning |
|---|-----------|----|----------|---------------|-------------|--------|---------|----------|-------|------------|-----------------|---------|
| 1 | Unknown   | 6  | 6.023    | 3054720       | 379869      | 51.887 | 55.179  | N/A      | 13911 | 6.380      | 1.277           |         |
| 2 | Unknown   | 6  | 7.420    | 2832552       | 308560      | 48.113 | 44.821  | N/A      | 15987 | N/A        | 1.270           |         |

| # | Peak Name | CH | tR [min] | Area [µV·sec] | Height [µV] | Area%  | Height% | Quantity | NTP   | Resolution | Symmetry Factor | Warning |
|---|-----------|----|----------|---------------|-------------|--------|---------|----------|-------|------------|-----------------|---------|
| 1 | Unknown   | 6  | 5.973    | 7858193       | 996799      | 98.437 | 98.731  | N/A      | 14499 | 6.230      | 1.289           |         |
| 2 | Unknown   | 6  | 7.337    | 124751        | 12814       | 1.563  | 1.269   | N/A      | 14905 | N/A        | N/A             |         |
